# Supplementary material for: Early Cretaceous Granitoids Magmatism in the Nagqu Area, Northern Tibet: Constraints on the Timing of the Lhasa–Qiangtang Collision
Source: MDPI journal article supplement (doi:10.3390/min12080933), 2022-07-24
Supplement: s1 [file s1]

Table S3 Whole-rock major (wt.%), trace element (ppm) and Sr-Nd isotopic data for the Yilashan and Amdo granitoids in the Nagqu area

| Sample                           | YLSZ-5                    | YLSZ-6 | YLSZ-7 | YLSZ-8 | YLSZ-9 | YLSZ-10 | YLSZ-11 | YLSZ-12 | YLSZ-13 | YLSZ-14 | YLSZ-15 | YLSS-2     | YLSS-3 | YLSS-4 | YLSS-5 |
|----------------------------------|---------------------------|--------|--------|--------|--------|---------|---------|---------|---------|---------|---------|------------|--------|--------|--------|
| Rock-type                        | Quartz diorite-porphyrite |        |        |        |        |         |         |         |         |         |         | Granophyre |        |        |        |
| Major elements (wt.%)            |                           |        |        |        |        |         |         |         |         |         |         |            |        |        |        |
| SiO <sub>2</sub>                 | 61.29                     | 61.60  | 62.66  | 62.47  | 63.04  | 63.05   | 63.22   | 62.41   | 62.57   | 62.69   | 62.69   | 73.5       | 73.0   | 73.4   | 73.22  |
| TiO <sub>2</sub>                 | 0.53                      | 0.52   | 0.53   | 0.51   | 0.50   | 0.52    | 0.49    | 0.53    | 0.52    | 0.52    | 0.50    | 0.17       | 0.18   | 0.18   | 0.17   |
| Al <sub>2</sub> O <sub>3</sub>   | 15.74                     | 15.90  | 15.56  | 15.66  | 15.59  | 15.80   | 15.46   | 16.06   | 15.84   | 15.75   | 15.91   | 14.15      | 14.40  | 14.10  | 14.44  |
| Fe <sub>2</sub> O <sub>3</sub> T | 5.28                      | 4.86   | 4.78   | 4.79   | 4.71   | 4.82    | 4.64    | 5.07    | 4.83    | 4.82    | 4.78    | 2.00       | 1.71   | 1.71   | 1.34   |
| MnO                              | 0.08                      | 0.08   | 0.08   | 0.08   | 0.07   | 0.08    | 0.07    | 0.08    | 0.08    | 0.08    | 0.08    | 0.04       | 0.05   | 0.04   | 0.04   |
| MgO                              | 3.38                      | 3.44   | 3.66   | 3.52   | 3.31   | 3.44    | 3.38    | 3.36    | 3.57    | 3.26    | 3.06    | 0.32       | 0.34   | 0.30   | 0.30   |
| CaO                              | 4.61                      | 4.44   | 3.59   | 3.80   | 3.20   | 2.94    | 3.44    | 3.15    | 3.18    | 3.77    | 4.11    | 1.49       | 1.50   | 1.48   | 1.45   |
| Na <sub>2</sub> O                | 3.32                      | 3.35   | 3.61   | 3.48   | 3.64   | 4.09    | 3.60    | 4.05    | 3.87    | 3.43    | 3.40    | 3.21       | 3.26   | 3.21   | 3.28   |
| K <sub>2</sub> O                 | 2.65                      | 2.69   | 2.73   | 2.77   | 2.94   | 2.67    | 2.83    | 2.72    | 2.67    | 2.86    | 2.85    | 4.40       | 4.38   | 4.34   | 4.34   |
| P <sub>2</sub> O <sub>5</sub>    | 0.14                      | 0.12   | 0.13   | 0.13   | 0.12   | 0.12    | 0.12    | 0.12    | 0.13    | 0.13    | 0.13    | 0.07       | 0.08   | 0.08   | 0.06   |
| BaO                              | 0.05                      | 0.05   | 0.06   | 0.05   | 0.06   | 0.05    | 0.06    | 0.06    | 0.04    | 0.06    | 0.05    | 0.08       | 0.08   | 0.08   | 0.07   |
| Cr <sub>2</sub> O <sub>3</sub>   | 0.01                      | 0.01   | 0.02   | 0.01   | 0.01   | 0.01    | 0.01    | 0.01    | 0.01    | 0.01    | 0.01    | <0.01      | <0.01  | <0.01  | <0.01  |
| SO <sub>3</sub>                  | 0.05                      | 0.01   | <0.01  | 0.01   | <0.01  | <0.01   | 0.01    | <0.01   | 0.01    | <0.01   | 0.01    | 0.01       | 0.02   | 0.01   | 0.01   |
| SrO                              | 0.04                      | 0.04   | 0.04   | 0.04   | 0.03   | 0.03    | 0.04    | 0.03    | 0.03    | 0.04    | 0.04    | 0.03       | 0.03   | 0.03   | 0.03   |
| LOI                              | 2.82                      | 2.76   | 2.91   | 2.75   | 2.61   | 2.30    | 2.76    | 2.19    | 2.44    | 2.27    | 2.23    | 0.56       | 0.71   | 0.70   | 0.92   |
| Mg <sup>#</sup> (volatile free)  | 59.9                      | 62.3   | 64.1   | 63.1   | 62.1   | 62.5    | 62.9    | 60.7    | 63.3    | 61.2    | 59.9    | 27.2       | 31.7   | 29.0   | 34.3   |
| 10000*Ga/Al                      | 2.23                      | 2.29   | 2.16   | 2.25   | 2.08   | 2.19    | 2.17    | 2.01    | 2.17    | 2.18    | 2.24    | 1.82       | 2.09   | 2.10   | 2.30   |
| A/CNK                            | 0.94                      | 0.96   | 1.01   | 1.00   | 1.04   | 1.06    | 1.01    | 1.05    | 1.05    | 1.01    | 0.99    | 1.11       | 1.12   | 1.11   | 1.13   |
| A/NK                             | 1.89                      | 1.89   | 1.75   | 1.80   | 1.70   | 1.64    | 1.72    | 1.67    | 1.71    | 1.80    | 1.83    | 1.41       | 1.43   | 1.41   | 1.43   |
| Trace elements (ppm)             |                           |        |        |        |        |         |         |         |         |         |         |            |        |        |        |
| Li                               | 45.8                      | 50.6   | 50.2   | 51.3   | 50.8   | 49.6    | 52.4    | 46.3    | 48.9    | 45.1    | 44.7    | 26.1       | 28.2   | 27.7   | 32.1   |
| Be                               | 1.79                      | 2.02   | 1.90   | 1.95   | 1.82   | 1.96    | 1.79    | 1.91    | 1.81    | 1.89    | 1.96    | 1.85       | 2.47   | 2.18   | 2.17   |

Continued

|    |       |       |       |       |       |       |       |       |       |       |       |      |      |      |       |
|----|-------|-------|-------|-------|-------|-------|-------|-------|-------|-------|-------|------|------|------|-------|
| Sc | 12.3  | 11.3  | 12.1  | 10.7  | 11.4  | 11.1  | 10.3  | 11.9  | 10.3  | 12.0  | 10.2  | 6.45 | 7.3  | 7.21 | 3.1   |
| V  | 98    | 92    | 99    | 93    | 96    | 105   | 86    | 100   | 93    | 106   | 90    | 3.08 | 3.14 | 2.8  | 2     |
| Cr | 110   | 110   | 110   | 106   | 100   | 110   | 97    | 100   | 100   | 110   | 104   | 12.3 | 13.2 | 8.25 | <1    |
| Co | 13.6  | 13.6  | 14.3  | 13.7  | 12.8  | 14.8  | 12.7  | 14.4  | 13.9  | 13.8  | 13.6  | 0.61 | 0.62 | 0.61 | 0.6   |
| Ni | 39.8  | 40.4  | 43.5  | 43.2  | 47.7  | 54.8  | 47.4  | 59.1  | 77.2  | 41.6  | 36.1  | 13.2 | 14.5 | 6.82 | 6.4   |
| Cu | 2.1   | 3.0   | 2.6   | 2.6   | 0.5   | 0.7   | 0.6   | 0.8   | 0.9   | 2.7   | 1.8   | 3.64 | 4.07 | 2.68 | 0.4   |
| Zn | 52    | 53    | 55    | 50    | 48    | 48    | 45    | 52    | 48    | 64    | 52    | 57.5 | 109  | 73.1 | 29    |
| Ga | 18.6  | 19.25 | 17.8  | 18.65 | 17.2  | 18.3  | 17.75 | 17.1  | 18.20 | 18.2  | 18.85 | 13.6 | 15.9 | 15.7 | 17.55 |
| Rb | 127.5 | 117.5 | 128.5 | 121.5 | 133.5 | 127.0 | 120.0 | 119.0 | 113.5 | 138.5 | 126.5 | 163  | 187  | 185  | 184.0 |
| Sr | 388   | 356   | 323   | 309   | 321   | 314   | 312   | 298   | 277   | 366   | 347   | 233  | 254  | 257  | 253   |
| Y  | 16.5  | 14.3  | 15.8  | 13.8  | 14.5  | 15.3  | 13.6  | 14.4  | 14.4  | 15.6  | 14.5  | 22.8 | 23.6 | 22   | 25.2  |
| Zr | 157   | 156   | 158   | 156   | 149   | 163   | 150   | 151   | 161   | 160   | 155   | 148  | 191  | 184  | 198   |
| Nb | 10.1  | 8.5   | 9.5   | 8.4   | 8.7   | 9.9   | 8.2   | 8.8   | 8.4   | 9.4   | 8.6   | 13.6 | 16.4 | 14.2 | 16.7  |
| Cs | 1.06  | 1.09  | 1.05  | 1.15  | 1.30  | 1.03  | 1.20  | 0.96  | 0.96  | 1.13  | 1.15  | 1.42 | 2.05 | 1.63 | 1.80  |
| Ba | 502   | 457   | 482   | 449   | 568   | 500   | 497   | 445   | 415   | 536   | 486   | 676  | 730  | 769  | 710   |
| La | 34.6  | 33.7  | 31.8  | 32.3  | 33.7  | 35.2  | 34.1  | 33.4  | 34.9  | 34.6  | 34.0  | 43.7 | 46.8 | 47.8 | 53.4  |
| Ce | 65.0  | 62.4  | 59.0  | 59.8  | 63.0  | 65.1  | 61.5  | 61.9  | 64.6  | 64.2  | 62.9  | 78.3 | 84.4 | 86.9 | 102.0 |
| Pr | 6.66  | 6.52  | 6.05  | 6.44  | 6.41  | 6.56  | 6.60  | 6.28  | 6.91  | 6.66  | 6.60  | 8.53 | 9.45 | 9.66 | 11.05 |
| Nd | 21.7  | 22.6  | 20.1  | 22.2  | 21.3  | 21.8  | 22.3  | 20.1  | 23.8  | 21.6  | 22.7  | 29.3 | 30.7 | 31.6 | 37.4  |
| Sm | 3.95  | 4.09  | 3.75  | 3.95  | 3.78  | 3.95  | 3.99  | 3.83  | 4.07  | 3.98  | 4.09  | 5.21 | 5.53 | 5.42 | 6.61  |
| Eu | 1.04  | 1.01  | 0.95  | 1.10  | 1.00  | 0.95  | 1.02  | 0.80  | 0.94  | 0.96  | 0.98  | 1.01 | 1.05 | 1.07 | 1.22  |
| Gd | 3.49  | 3.49  | 3.25  | 3.38  | 3.10  | 3.22  | 3.31  | 3.14  | 3.57  | 3.34  | 3.41  | 4.47 | 4.55 | 4.45 | 5.24  |
| Tb | 0.48  | 0.48  | 0.49  | 0.48  | 0.45  | 0.45  | 0.48  | 0.44  | 0.52  | 0.48  | 0.46  | 0.67 | 0.71 | 0.66 | 0.86  |
| Dy | 2.77  | 2.71  | 2.67  | 2.60  | 2.56  | 2.63  | 2.55  | 2.49  | 2.53  | 2.76  | 2.56  | 3.79 | 3.96 | 3.54 | 4.38  |
| Ho | 0.58  | 0.50  | 0.53  | 0.52  | 0.52  | 0.52  | 0.51  | 0.51  | 0.52  | 0.56  | 0.52  | 0.75 | 0.8  | 0.72 | 0.85  |

|                                                      |          |       |       |       |       |          |       |       |       |          |       |          |          |          |      |
|------------------------------------------------------|----------|-------|-------|-------|-------|----------|-------|-------|-------|----------|-------|----------|----------|----------|------|
| Continued                                            |          |       |       |       |       |          |       |       |       |          |       |          |          |          |      |
| Er                                                   | 1.56     | 1.56  | 1.44  | 1.53  | 1.40  | 1.48     | 1.51  | 1.36  | 1.63  | 1.49     | 1.57  | 2.2      | 2.36     | 2.09     | 2.53 |
| Tm                                                   | 0.23     | 0.24  | 0.23  | 0.23  | 0.22  | 0.23     | 0.23  | 0.21  | 0.24  | 0.22     | 0.24  | 0.32     | 0.35     | 0.3      | 0.39 |
| Yb                                                   | 1.48     | 1.57  | 1.42  | 1.46  | 1.37  | 1.45     | 1.48  | 1.38  | 1.48  | 1.47     | 1.48  | 2.12     | 2.21     | 1.98     | 2.60 |
| Lu                                                   | 0.23     | 0.25  | 0.22  | 0.24  | 0.22  | 0.22     | 0.22  | 0.22  | 0.23  | 0.23     | 0.22  | 0.31     | 0.33     | 0.29     | 0.42 |
| Hf                                                   | 4.1      | 4.2   | 4.0   | 4.2   | 4.1   | 4.3      | 4.2   | 3.9   | 4.5   | 4.1      | 4.3   | 4.15     | 5.03     | 4.61     | 5.8  |
| Ta                                                   | 0.66     | 0.69  | 0.67  | 0.68  | 0.64  | 0.69     | 0.66  | 0.67  | 0.73  | 0.65     | 0.68  | 1.2      | 1.36     | 1.17     | 1.34 |
| W                                                    | 0.3      | 0.3   | 0.3   | 0.3   | 0.3   | 0.3      | 0.3   | 0.3   | 0.3   | 0.2      | 0.3   | 0.82     | 1.15     | 0.95     | 0.7  |
| Tl                                                   | 0.45     | 0.45  | 0.44  | 0.46  | 0.41  | 0.41     | 0.44  | 0.44  | 0.41  | 0.47     | 0.49  | 0.7      | 0.79     | 0.77     | 0.80 |
| Pb                                                   | 17.5     | 17.3  | 14.7  | 17.1  | 19.2  | 17.8     | 19.0  | 14.8  | 17.9  | 17.4     | 16.6  | 33       | 34.6     | 34.3     | 37.8 |
| Bi                                                   | 0.03     | 0.02  | 0.02  | 0.02  | 0.03  | 0.03     | 0.02  | 0.03  | 0.02  | 0.03     | 0.03  | 0.021    | 0.007    | 0.016    | 0.02 |
| Th                                                   | 17.40    | 14.80 | 17.40 | 14.50 | 17.70 | 17.70    | 15.15 | 16.20 | 15.40 | 17.10    | 14.55 | 23.8     | 24.6     | 24.3     | 26.4 |
| U                                                    | 2.72     | 2.19  | 2.76  | 2.31  | 2.58  | 2.75     | 2.15  | 2.61  | 2.39  | 3.15     | 2.65  | 2.32     | 2.49     | 2.39     | 2.58 |
| δEu                                                  | 0.86     | 0.82  | 0.83  | 0.92  | 0.89  | 0.81     | 0.86  | 0.71  | 0.75  | 0.80     | 0.80  | 0.64     | 0.64     | 0.67     | 0.63 |
| T (°C) Zr (sat.)                                     | 756      | 758   | 766   | 764   | 766   | 774      | 764   | 766   | 773   | 768      | 762   | 787      | 810      | 807      | 815  |
| Isotope analyses                                     |          |       |       |       |       |          |       |       |       |          |       |          |          |          |      |
| <sup>87</sup> Sr/ <sup>86</sup> Sr                   | 0.712158 |       |       |       |       | 0.712403 |       |       |       | 0.712442 |       | 0.715540 | 0.715554 | 0.715403 |      |
| Error (2σ)                                           | 0.000006 |       |       |       |       | 0.000008 |       |       |       | 0.000004 |       | 0.000006 | 0.000007 | 0.000005 |      |
| <sup>143</sup> Nd/ <sup>144</sup> Nd                 | 0.512113 |       |       |       |       | 0.512114 |       |       |       | 0.512109 |       | 0.511971 | 0.511952 | 0.511955 |      |
| Error (2σ)                                           | 0.000005 |       |       |       |       | 0.000004 |       |       |       | 0.000004 |       | 0.000003 | 0.000003 | 0.000004 |      |
| ( <sup>87</sup> Sr/ <sup>86</sup> Sr) <sub>i</sub>   | 0.710698 |       |       |       |       | 0.710606 |       |       |       | 0.710761 |       | 0.712316 | 0.712161 | 0.712085 |      |
| ( <sup>143</sup> Nd/ <sup>144</sup> Nd) <sub>i</sub> | 0.512035 |       |       |       |       | 0.512037 |       |       |       | 0.512030 |       | 0.511892 | 0.511872 | 0.511879 |      |
| ε <sub>Nd</sub> (t)                                  | -9.0     |       |       |       |       | -9.0     |       |       |       | -9.1     |       | -11.7    | -12.1    | -12.0    |      |
| T <sub>DM</sub> (Ga)                                 | 1.52     |       |       |       |       | 1.52     |       |       |       | 1.55     |       | 1.69     | 1.74     | 1.65     |      |

| Continued                        |         |       |       |       |       |       |         |       |       |       |       |       |         |       |       |       |
|----------------------------------|---------|-------|-------|-------|-------|-------|---------|-------|-------|-------|-------|-------|---------|-------|-------|-------|
| Sample                           | BCD-1   | BCD-2 | BCD-3 | BCD-4 | BCD-5 | BCD-6 | BCN-1   | BCN-2 | BCN-3 | BCN-4 | BCN-5 | BCN-6 | TL-1    | TL-2  | TL-3  | TL-4  |
| Rock-type                        | Granite |       |       |       |       |       | Granite |       |       |       |       |       | Granite |       |       |       |
| Major elements (wt.%)            |         |       |       |       |       |       |         |       |       |       |       |       |         |       |       |       |
| SiO <sub>2</sub>                 | 69.7    | 69.0  | 68.90 | 72.5  | 71.14 | 68.86 | 69.4    | 69.3  | 70.4  | 70.38 | 71.67 | 69.3  | 70.5    | 70.65 | 70.9  | 70.9  |
| TiO <sub>2</sub>                 | 0.40    | 0.42  | 0.40  | 0.25  | 0.32  | 0.42  | 0.66    | 0.44  | 0.43  | 0.47  | 0.42  | 0.47  | 0.45    | 0.42  | 0.43  | 0.44  |
| Al <sub>2</sub> O <sub>3</sub>   | 15.80   | 16.30 | 16.04 | 14.55 | 15.30 | 16.10 | 14.45   | 14.55 | 14.35 | 13.98 | 13.85 | 14.60 | 14.60   | 14.29 | 14.65 | 14.55 |
| Fe <sub>2</sub> O <sub>3</sub> T | 2.54    | 2.99  | 3.63  | 2.00  | 2.80  | 3.58  | 3.78    | 3.04  | 2.98  | 4.14  | 2.89  | 3.34  | 2.77    | 3.20  | 2.73  | 2.60  |
| MnO                              | 0.04    | 0.04  | 0.05  | 0.03  | 0.04  | 0.05  | 0.06    | 0.05  | 0.05  | 0.06  | 0.05  | 0.05  | 0.04    | 0.05  | 0.04  | 0.04  |
| MgO                              | 0.86    | 0.93  | 0.92  | 0.54  | 0.71  | 0.92  | 1.11    | 0.82  | 0.78  | 0.91  | 0.70  | 0.82  | 0.63    | 0.60  | 0.58  | 0.57  |
| CaO                              | 2.52    | 2.94  | 2.35  | 1.54  | 1.98  | 3.11  | 2.25    | 2.01  | 1.54  | 2.01  | 1.51  | 1.96  | 1.80    | 1.44  | 1.74  | 1.56  |
| Na <sub>2</sub> O                | 3.84    | 4.31  | 4.37  | 3.16  | 4.06  | 4.55  | 3.14    | 2.94  | 3.00  | 3.01  | 2.80  | 3.02  | 3.02    | 3.15  | 2.96  | 2.92  |
| K <sub>2</sub> O                 | 3.35    | 2.25  | 2.20  | 4.95  | 2.86  | 1.52  | 3.95    | 5.33  | 5.00  | 4.14  | 4.97  | 5.23  | 4.71    | 4.84  | 5.02  | 5.27  |
| P <sub>2</sub> O <sub>5</sub>    | 0.12    | 0.13  | 0.11  | 0.07  | 0.10  | 0.11  | 0.23    | 0.15  | 0.15  | 0.16  | 0.21  | 0.15  | 0.13    | 0.12  | 0.13  | 0.13  |
| BaO                              | 0.04    | 0.02  | 0.02  | 0.06  | 0.04  | 0.02  | 0.04    | 0.06  | 0.05  | 0.06  | 0.07  | 0.07  | 0.06    | 0.07  | 0.06  | 0.06  |
| Cr <sub>2</sub> O <sub>3</sub>   | <0.01   | <0.01 | <0.01 | <0.01 | 0.01  | <0.01 | <0.01   | <0.01 | <0.01 | <0.01 | <0.01 | 0.01  | <0.01   | <0.01 | <0.01 | <0.01 |
| SO <sub>3</sub>                  | 0.01    | 0.01  | <0.01 | 0.01  | <0.01 | <0.01 | 0.02    | 0.01  | 0.01  | 0.01  | <0.01 | <0.01 | 0.01    | <0.01 | 0.01  | 0.01  |
| SrO                              | 0.03    | 0.04  | 0.04  | 0.03  | 0.03  | 0.04  | 0.03    | 0.03  | 0.03  | 0.03  | 0.03  | 0.03  | 0.03    | 0.03  | 0.03  | 0.03  |
| LOI                              | 0.95    | 0.98  | 0.83  | 0.55  | 0.93  | 0.57  | 0.95    | 0.91  | 0.62  | 0.59  | 0.64  | 0.76  | 0.85    | 0.72  | 0.70  | 0.88  |
| Mg <sup>#</sup> (volatile free)  | 44      | 42    | 37    | 39    | 37    | 37    | 41      | 39    | 38    | 34    | 36    | 36    | 35      | 30    | 33    | 34    |
| 10000*Ga/Al                      | 1.96    | 2.07  | 2.66  | 1.79  | 2.41  | 2.51  | 2.76    | 2.39  | 2.32  | 2.97  | 2.84  | 2.32  | 2.41    | 2.93  | 2.39  | 2.41  |
| A/CNK                            | 1.09    | 1.10  | 1.16  | 1.09  | 1.14  | 1.09  | 1.07    | 1.02  | 1.09  | 1.07  | 1.09  | 1.03  | 1.09    | 1.10  | 1.09  | 1.09  |
| A/NK                             | 1.59    | 1.71  | 1.68  | 1.38  | 1.57  | 1.76  | 1.53    | 1.37  | 1.39  | 1.48  | 1.39  | 1.37  | 1.45    | 1.37  | 1.42  | 1.38  |
| Trace elements (ppm)             |         |       |       |       |       |       |         |       |       |       |       |       |         |       |       |       |
| Li                               | 46.7    | 55.6  | 49.7  | 35.2  | 47.9  | 47.6  | 75.6    | 45.9  | 54.1  | 54.2  | 47.5  | 48.9  | 51.9    | 35.1  | 49.9  | 46.2  |

Continued

|    |      |      |      |      |      |       |      |      |      |       |       |      |      |       |      |      |
|----|------|------|------|------|------|-------|------|------|------|-------|-------|------|------|-------|------|------|
| Be | 3.23 | 4.43 | 4.68 | 2.09 | 2.77 | 4.37  | 5.88 | 4.85 | 5    | 5.59  | 4.53  | 4.83 | 4.42 | 4.20  | 4.72 | 4.51 |
| Sc | 6.76 | 6.53 | 3.9  | 6.53 | 3.3  | 4.2   | 8.02 | 8.12 | 8.34 | 4.4   | 4.0   | 7.36 | 7.14 | 3.7   | 7.34 | 7.85 |
| V  | 32   | 33.9 | 28   | 19.8 | 21   | 32    | 40.8 | 30.3 | 27.9 | 39    | 29    | 29.2 | 25.8 | 32    | 22.6 | 21.9 |
| Cr | 5.41 | 11.7 | 10   | 10.9 | 12   | 8     | 12.8 | 23.2 | 16.8 | 25    | 13    | 16.3 | 14.7 | 15    | 17.3 | 22   |
| Co | 4.24 | 4.77 | 4.6  | 2.58 | 3.7  | 4.8   | 6    | 4.36 | 4.03 | 5.0   | 3.8   | 4.41 | 3.14 | 3.2   | 3.16 | 3.04 |
| Ni | 3.93 | 5.17 | 2.8  | 4.9  | 3.6  | 2.9   | 6.29 | 11.9 | 6.79 | 5.4   | 3.3   | 5.42 | 3.64 | 3.1   | 4.59 | 7.35 |
| Cu | 10.2 | 10.1 | 0.2  | 5.5  | <0.2 | <0.2  | 8.55 | 12.7 | 26.4 | 1.4   | 0.8   | 8.02 | 3.9  | 0.2   | 8.22 | 6.76 |
| Zn | 150  | 76.3 | 62   | 165  | 47   | 58    | 104  | 87.8 | 126  | 56    | 48    | 119  | 81.9 | 56    | 115  | 120  |
| Ga | 16.4 | 17.9 | 22.6 | 13.8 | 19.5 | 21.4  | 21.1 | 18.4 | 17.6 | 22.0  | 20.8  | 17.9 | 18.6 | 22.2  | 18.5 | 18.6 |
| Rb | 194  | 126  | 209  | 243  | 203  | 157.0 | 330  | 324  | 291  | 329   | 353   | 325  | 279  | 336   | 298  | 314  |
| Sr | 249  | 310  | 383  | 217  | 310  | 335   | 246  | 269  | 236  | 291   | 288   | 260  | 200  | 243   | 203  | 228  |
| Y  | 8.46 | 9.29 | 10.0 | 5.03 | 7.5  | 9.8   | 27.2 | 17   | 16.2 | 20.0  | 19.0  | 18.1 | 14.5 | 16.2  | 14.5 | 15.8 |
| Zr | 156  | 160  | 194  | 117  | 142  | 178   | 394  | 279  | 263  | 326   | 289   | 291  | 274  | 277   | 268  | 281  |
| Nb | 8.45 | 9.02 | 8.8  | 5.27 | 7.5  | 9.5   | 35.4 | 22.8 | 22.4 | 25.4  | 23.2  | 24.3 | 22   | 22.5  | 22.4 | 22.6 |
| Cs | 9.25 | 6.27 | 8.83 | 6.67 | 5.29 | 9.03  | 18.4 | 11.7 | 11.7 | 13.55 | 13.05 | 10.9 | 7.97 | 7.43  | 7.59 | 10.2 |
| Ba | 273  | 187  | 209  | 508  | 323  | 165.0 | 329  | 563  | 453  | 458   | 566   | 522  | 537  | 573   | 540  | 578  |
| La | 16.6 | 21.8 | 36.5 | 13.3 | 18.9 | 30.2  | 116  | 82.6 | 71.3 | 96.0  | 80.5  | 87.4 | 38.2 | 78.6  | 45.5 | 71.6 |
| Ce | 43.6 | 53.2 | 75.2 | 29.4 | 43.1 | 66.0  | 213  | 148  | 124  | 177.0 | 147.5 | 155  | 84.7 | 149.0 | 91.5 | 118  |
| Pr | 3.31 | 4.63 | 5.57 | 2.6  | 3.78 | 5.37  | 21.8 | 14.7 | 13   | 17.30 | 15.20 | 15.5 | 7.52 | 13.80 | 8.49 | 12.6 |
| Nd | 11.5 | 15.4 | 19.6 | 9.11 | 13.2 | 18.6  | 73.1 | 47.2 | 44.3 | 58.9  | 51.8  | 50.9 | 24.5 | 46.0  | 26.4 | 40.3 |
| Sm | 2.17 | 2.89 | 3.41 | 1.63 | 2.15 | 2.97  | 11.5 | 7.36 | 7.01 | 8.45  | 8.00  | 7.86 | 4.29 | 6.66  | 4.5  | 6.4  |
| Eu | 0.59 | 0.64 | 0.67 | 0.51 | 0.60 | 0.65  | 1.34 | 1.03 | 0.93 | 1.14  | 1.07  | 1.07 | 0.80 | 0.95  | 0.84 | 0.94 |
| Gd | 1.83 | 2.27 | 2.38 | 1.29 | 1.81 | 2.32  | 7.88 | 5.00 | 4.78 | 5.75  | 5.44  | 5.36 | 3.42 | 4.73  | 3.49 | 4.49 |
| Tb | 0.27 | 0.33 | 0.34 | 0.18 | 0.22 | 0.31  | 1.07 | 0.67 | 0.64 | 0.73  | 0.67  | 0.73 | 0.51 | 0.57  | 0.5  | 0.61 |

|                                                      |          |      |          |      |          |      |          |      |          |      |          |      |          |      |          |      |  |
|------------------------------------------------------|----------|------|----------|------|----------|------|----------|------|----------|------|----------|------|----------|------|----------|------|--|
| Continued                                            |          |      |          |      |          |      |          |      |          |      |          |      |          |      |          |      |  |
| Dy                                                   | 1.41     | 1.61 | 1.93     | 0.89 | 1.33     | 1.81 | 5.15     | 3.12 | 2.98     | 3.82 | 3.50     | 3.27 | 2.66     | 3.29 | 2.66     | 2.9  |  |
| Ho                                                   | 0.26     | 0.32 | 0.33     | 0.16 | 0.24     | 0.31 | 0.9      | 0.54 | 0.52     | 0.64 | 0.64     | 0.6  | 0.48     | 0.57 | 0.47     | 0.52 |  |
| Er                                                   | 0.77     | 0.88 | 0.92     | 0.45 | 0.71     | 0.90 | 2.56     | 1.61 | 1.51     | 1.79 | 1.67     | 1.66 | 1.31     | 1.42 | 1.33     | 1.41 |  |
| Tm                                                   | 0.12     | 0.12 | 0.13     | 0.06 | 0.10     | 0.13 | 0.34     | 0.21 | 0.2      | 0.25 | 0.23     | 0.22 | 0.18     | 0.20 | 0.18     | 0.19 |  |
| Yb                                                   | 0.81     | 0.86 | 0.82     | 0.45 | 0.67     | 0.80 | 2.22     | 1.43 | 1.37     | 1.61 | 1.42     | 1.48 | 1.18     | 1.34 | 1.22     | 1.2  |  |
| Lu                                                   | 0.11     | 0.12 | 0.13     | 0.06 | 0.10     | 0.12 | 0.3      | 0.19 | 0.19     | 0.23 | 0.21     | 0.2  | 0.17     | 0.21 | 0.17     | 0.17 |  |
| Hf                                                   | 4.06     | 4.11 | 5.0      | 3.02 | 3.9      | 5.0  | 9.74     | 6.72 | 6.59     | 8.8  | 7.6      | 7.22 | 6.96     | 7.9  | 6.95     | 6.95 |  |
| Ta                                                   | 0.9      | 0.89 | 0.76     | 0.4  | 0.59     | 0.95 | 3.01     | 1.87 | 1.76     | 1.98 | 1.76     | 1.95 | 1.71     | 1.71 | 1.9      | 1.79 |  |
| Pb                                                   | 34.7     | 29.5 | 28.0     | 44.5 | 34.8     | 26.8 | 43.9     | 52.2 | 47.7     | 42.5 | 48.2     | 47.7 | 42       | 47.6 | 47.8     | 52   |  |
| Th                                                   | 17.3     | 18.1 | 20.9     | 20.4 | 19.40    | 20.8 | 105      | 69.8 | 64.5     | 85.5 | 78.5     | 77.4 | 56.1     | 68.3 | 55.5     | 74.1 |  |
| U                                                    | 1.91     | 2.95 | 2.64     | 1.83 | 2.32     | 3.22 | 8.01     | 5.25 | 4.15     | 6.36 | 5.34     | 4.81 | 3.44     | 2.45 | 3.1      | 4.11 |  |
| δEu                                                  | 0.90     | 0.76 | 0.72     | 1.08 | 0.93     | 0.76 | 0.43     | 0.52 | 0.49     | 0.50 | 0.50     | 0.51 | 0.64     | 0.52 | 0.65     | 0.54 |  |
| T (°C) Zr (sat.)                                     | 784      | 785  | 809      | 763  | 783      | 794  | 869      | 830  | 834      | 852  | 844      | 834  | 838      | 840  | 835      | 840  |  |
| <i>Isotope analyses</i>                              |          |      |          |      |          |      |          |      |          |      |          |      |          |      |          |      |  |
| <sup>87</sup> Sr/ <sup>86</sup> Sr                   | 0.719649 |      | 0.715287 |      | 0.712295 |      | 0.720096 |      | 0.719317 |      | 0.720779 |      | 0.720359 |      | 0.720543 |      |  |
| Error (2σ)                                           | 0.000007 |      | 0.000007 |      | 0.000008 |      | 0.000007 |      | 0.000007 |      | 0.000005 |      | 0.000005 |      | 0.000005 |      |  |
| <sup>143</sup> Nd/ <sup>144</sup> Nd                 | 0.512002 |      | 0.512165 |      | 0.512157 |      | 0.512000 |      | 0.511997 |      | 0.511993 |      | 0.511990 |      | 0.511998 |      |  |
| Error (2σ)                                           | 0.000003 |      | 0.000007 |      | 0.000004 |      | 0.000003 |      | 0.000003 |      | 0.000003 |      | 0.000004 |      | 0.000005 |      |  |
| ( <sup>87</sup> Sr/ <sup>86</sup> Sr) <sub>i</sub>   | 0.717792 |      | 0.710172 |      | 0.710155 |      | 0.713413 |      | 0.714058 |      | 0.714461 |      | 0.714097 |      | 0.714306 |      |  |
| ( <sup>143</sup> Nd/ <sup>144</sup> Nd) <sub>i</sub> | 0.511920 |      | 0.512086 |      | 0.512086 |      | 0.511925 |      | 0.511933 |      | 0.511917 |      | 0.511927 |      | 0.511929 |      |  |
| ε <sub>Nd</sub> (t)                                  | -11.23   |      | -7.98    |      | -7.97    |      | -10.88   |      | -10.92   |      | -11.31   |      | -11.11   |      | -11.08   |      |  |
| T <sub>DM</sub> (Ga)                                 | 1.74     |      | 1.42     |      | 1.29     |      | 1.48     |      | 1.38     |      | 1.63     |      | 1.40     |      | 1.49     |      |  |

Note: Fe<sub>2</sub>O<sub>3</sub>T represents total Fe-oxides; Mg<sup>#</sup> = molar Mg/(Mg+Fe); A/CNK = (Al<sub>2</sub>O<sub>3</sub>/101.94)/((CaO/56.08)+(Na<sub>2</sub>O/61.982)+(K<sub>2</sub>O/94.2)); A/NK = (Al<sub>2</sub>O<sub>3</sub>/101.94)/((Na<sub>2</sub>O/61.982)+(K<sub>2</sub>O/94.2)); δEu = Eu<sub>N</sub>/(Sm<sub>N</sub>\*Gd<sub>N</sub>)<sup>0.5</sup>; LOI: Loss on ignition.
