# Supplementary material for: Early Cretaceous Granitoids Magmatism in the Nagqu Area, Northern Tibet: Constraints on the Timing of the Lhasa–Qiangtang Collision
Source: MDPI journal article supplement (doi:10.3390/min12080933), 2022-07-24
Supplement: s1 [file s1]

Table S2 Zircon Lu-Hf isotopic data for the Yilashan and Amdo granitoids in the Nagqu area

| Analytical spot                            | Age (Ma) | $^{176}\text{Yb}/^{177}\text{Hf}$ | $^{176}\text{Lu}/^{177}\text{Hf}$ | $^{176}\text{Hf}/^{177}\text{Hf}$ | $2\sigma$ | $^{176}\text{Hf}/^{177}\text{Hf}_i$ | $\varepsilon_{\text{Hf}}(t)$ | $2\sigma$ | $T_{\text{DM1}}(\text{Ga})$ | $T_{\text{DM2}}(\text{Ga})$ |
|--------------------------------------------|----------|-----------------------------------|-----------------------------------|-----------------------------------|-----------|-------------------------------------|------------------------------|-----------|-----------------------------|-----------------------------|
| <i>YLSZ-9 (Quartz diorite-porphyrite)</i>  |          |                                   |                                   |                                   |           |                                     |                              |           |                             |                             |
| YLSZ-9-2                                   | 966      | 0.011757                          | 0.000417                          | 0.281989                          | 0.000016  | 0.281981                            | -6.6                         | 0.30      | 1.75                        | 2.23                        |
| YLSZ-9-3                                   | 176      | 0.010276                          | 0.000366                          | 0.281996                          | 0.000018  | 0.281995                            | -23.6                        | 0.37      | 1.74                        | 2.70                        |
| YLSZ-9-8                                   | 566      | 0.012719                          | 0.000423                          | 0.281791                          | 0.000020  | 0.281786                            | -22.4                        | 0.43      | 2.02                        | 2.92                        |
| YLSZ-9-9                                   | 108      | 0.125431                          | 0.004871                          | 0.282561                          | 0.000025  | 0.282552                            | -5.4                         | 0.60      | 1.09                        | 1.51                        |
| YLSZ-9-10                                  | 107      | 0.124689                          | 0.004817                          | 0.282520                          | 0.000026  | 0.282510                            | -6.9                         | 0.64      | 1.15                        | 1.60                        |
| YLSZ-9-11                                  | 105      | 0.084811                          | 0.003111                          | 0.282591                          | 0.000027  | 0.282585                            | -4.3                         | 0.68      | 0.99                        | 1.44                        |
| YLSZ-9-13                                  | 109      | 0.056593                          | 0.002333                          | 0.282426                          | 0.000039  | 0.282421                            | -10.0                        | 1.11      | 1.21                        | 1.80                        |
| YLSZ-9-14                                  | 570      | 0.011375                          | 0.000432                          | 0.282167                          | 0.000021  | 0.282162                            | -9.0                         | 0.46      | 1.51                        | 2.08                        |
| YLSZ-9-15                                  | 108      | 0.024133                          | 0.000958                          | 0.282536                          | 0.000023  | 0.282534                            | -6.1                         | 0.53      | 1.01                        | 1.55                        |
| YLSZ-9-16                                  | 565      | 0.012603                          | 0.000439                          | 0.282053                          | 0.000020  | 0.282048                            | -13.2                        | 0.42      | 1.66                        | 2.34                        |
| YLSZ-9-17                                  | 109      | 0.072892                          | 0.002911                          | 0.282501                          | 0.000022  | 0.282495                            | -7.4                         | 0.51      | 1.12                        | 1.63                        |
| YLSZ-9-18                                  | 566      | 0.019827                          | 0.000726                          | 0.282342                          | 0.000022  | 0.282335                            | -3.0                         | 0.49      | 1.28                        | 1.70                        |
| YLSZ-9-20                                  | 995      | 0.012520                          | 0.000427                          | 0.282375                          | 0.000018  | 0.282367                            | 7.7                          | 0.35      | 1.22                        | 1.36                        |
| YLSZ-9-21                                  | 110      | 0.059889                          | 0.002035                          | 0.282544                          | 0.000028  | 0.282540                            | -5.8                         | 0.71      | 1.03                        | 1.53                        |
| YLSZ-9-22                                  | 564      | 0.007491                          | 0.000272                          | 0.282322                          | 0.000020  | 0.282320                            | -3.6                         | 0.41      | 1.29                        | 1.74                        |
| YLSZ-9-23                                  | 993      | 0.043936                          | 0.001460                          | 0.282254                          | 0.000022  | 0.282227                            | 2.7                          | 0.51      | 1.42                        | 1.67                        |
| YLSZ-9-24                                  | 567      | 0.015006                          | 0.000514                          | 0.281906                          | 0.000022  | 0.281901                            | -18.3                        | 0.48      | 1.87                        | 2.66                        |
| <i>YLSZ-10 (Quartz diorite-porphyrite)</i> |          |                                   |                                   |                                   |           |                                     |                              |           |                             |                             |
| YLSZ-10-2                                  | 107      | 0.165615                          | 0.006472                          | 0.282542                          | 0.000030  | 0.282529                            | -6.3                         | 0.76      | 1.18                        | 1.56                        |
| YLSZ-10-3                                  | 106      | 0.060036                          | 0.002428                          | 0.282575                          | 0.000022  | 0.282570                            | -4.8                         | 0.49      | 1.00                        | 1.47                        |
| YLSZ-10-7                                  | 108      | 0.243804                          | 0.009315                          | 0.282656                          | 0.000035  | 0.282637                            | -2.4                         | 0.95      | 1.08                        | 1.32                        |
| YLSZ-10-9                                  | 565      | 0.029286                          | 0.000978                          | 0.282266                          | 0.000020  | 0.282256                            | -5.8                         | 0.43      | 1.39                        | 1.88                        |
| YLSZ-10-12                                 | 565      | 0.014177                          | 0.000488                          | 0.282367                          | 0.000014  | 0.282362                            | -2.0                         | 0.23      | 1.23                        | 1.64                        |

Continued

|                            |     |          |          |          |          |          |       |      |      |      |
|----------------------------|-----|----------|----------|----------|----------|----------|-------|------|------|------|
| YLSZ-10-13                 | 564 | 0.052194 | 0.001673 | 0.281991 | 0.000017 | 0.281973 | -15.9 | 0.34 | 1.81 | 2.50 |
| YLSZ-10-15                 | 929 | 0.005892 | 0.000208 | 0.282159 | 0.000018 | 0.282155 | -1.3  | 0.37 | 1.51 | 1.87 |
| YLSZ-10-19                 | 494 | 0.021334 | 0.000741 | 0.281990 | 0.000023 | 0.281983 | -17.1 | 0.53 | 1.76 | 2.53 |
| YLSZ-10-20                 | 109 | 0.097870 | 0.003605 | 0.282507 | 0.000028 | 0.282499 | -7.3  | 0.70 | 1.13 | 1.62 |
| YLSZ-10-22                 | 111 | 0.079218 | 0.003065 | 0.282458 | 0.000058 | 0.282451 | -8.9  | 1.78 | 1.19 | 1.73 |
| YLSZ-10-23                 | 108 | 0.100423 | 0.003604 | 0.282500 | 0.000034 | 0.282493 | -7.5  | 0.93 | 1.14 | 1.64 |
| YLSZ-10-24                 | 112 | 0.038231 | 0.001510 | 0.282588 | 0.000036 | 0.282585 | -4.1  | 0.99 | 0.95 | 1.43 |
| YLSZ-10-25                 | 111 | 0.115725 | 0.004298 | 0.282699 | 0.000031 | 0.282690 | -0.5  | 0.80 | 0.86 | 1.20 |
| YLSZ-10-26                 | 109 | 0.113751 | 0.004164 | 0.282533 | 0.000034 | 0.282524 | -6.4  | 0.92 | 1.11 | 1.57 |
| <i>YLSS-4 (Granophyre)</i> |     |          |          |          |          |          |       |      |      |      |
| YLSS-4-1                   | 111 | 0.068472 | 0.002419 | 0.282341 | 0.000023 | 0.282336 | -13.0 | 0.53 | 1.34 | 1.99 |
| YLSS-4-2                   | 112 | 0.051040 | 0.001837 | 0.282315 | 0.000023 | 0.282311 | -13.8 | 0.52 | 1.35 | 2.04 |
| YLSS-4-3                   | 112 | 0.057101 | 0.002024 | 0.282378 | 0.000020 | 0.282374 | -11.6 | 0.43 | 1.27 | 1.90 |
| YLSS-4-4                   | 112 | 0.056174 | 0.001990 | 0.282370 | 0.000020 | 0.282366 | -11.9 | 0.41 | 1.28 | 1.92 |
| YLSS-4-5                   | 110 | 0.045504 | 0.001596 | 0.282335 | 0.000021 | 0.282332 | -13.2 | 0.45 | 1.32 | 2.00 |
| YLSS-4-7                   | 111 | 0.054679 | 0.001923 | 0.282346 | 0.000022 | 0.282342 | -12.8 | 0.49 | 1.31 | 1.97 |
| YLSS-4-11                  | 112 | 0.056569 | 0.002014 | 0.282372 | 0.000027 | 0.282368 | -11.8 | 0.66 | 1.28 | 1.92 |
| YLSS-4-12                  | 111 | 0.063049 | 0.002190 | 0.282377 | 0.000026 | 0.282372 | -11.7 | 0.64 | 1.28 | 1.91 |
| YLSS-4-13                  | 113 | 0.073751 | 0.002554 | 0.282366 | 0.000022 | 0.282361 | -12.1 | 0.51 | 1.30 | 1.93 |
| YLSS-4-14                  | 112 | 0.032259 | 0.001105 | 0.282385 | 0.000019 | 0.282383 | -11.3 | 0.40 | 1.23 | 1.88 |
| YLSS-4-19                  | 112 | 0.065017 | 0.002253 | 0.282375 | 0.000020 | 0.282370 | -11.8 | 0.43 | 1.28 | 1.91 |
| YLSS-4-20                  | 110 | 0.061886 | 0.002172 | 0.282392 | 0.000021 | 0.282387 | -11.2 | 0.45 | 1.25 | 1.87 |
| YLSS-4-22                  | 111 | 0.065030 | 0.002244 | 0.282396 | 0.000020 | 0.282392 | -11.0 | 0.43 | 1.25 | 1.86 |
| YLSS-4-23                  | 111 | 0.082188 | 0.002909 | 0.282343 | 0.000022 | 0.282337 | -13.0 | 0.49 | 1.35 | 1.99 |

Continued

|                        |     |          |          |          |          |          |       |     |      |      |
|------------------------|-----|----------|----------|----------|----------|----------|-------|-----|------|------|
| <i>BCD-1 (Granite)</i> |     |          |          |          |          |          |       |     |      |      |
| BCD-1-2                | 451 | 0.024699 | 0.000673 | 0.282355 | 0.000022 | 0.282349 | -5.0  | 0.5 | 1.26 | 1.74 |
| BCD-1-4                | 451 | 0.018531 | 0.000588 | 0.282478 | 0.000015 | 0.282473 | -0.6  | 0.2 | 1.08 | 1.47 |
| BCD-1-5                | 451 | 0.044002 | 0.001163 | 0.282373 | 0.000021 | 0.282363 | -4.5  | 0.5 | 1.25 | 1.71 |
| BCD-1-7                | 162 | 0.016057 | 0.000434 | 0.282512 | 0.000015 | 0.282511 | -5.7  | 0.2 | 1.03 | 1.57 |
| BCD-1-8                | 448 | 0.041549 | 0.001139 | 0.282305 | 0.000021 | 0.282295 | -7.0  | 0.5 | 1.34 | 1.86 |
| BCD-1-11               | 450 | 0.025489 | 0.000849 | 0.282388 | 0.000019 | 0.282381 | -3.9  | 0.4 | 1.22 | 1.67 |
| BCD-1-18               | 109 | 0.045573 | 0.001189 | 0.282776 | 0.000022 | 0.282774 | 2.5   | 0.5 | 0.68 | 1.01 |
| BCD-1-22               | 112 | 0.030208 | 0.000987 | 0.282474 | 0.000026 | 0.282472 | -8.2  | 0.7 | 1.10 | 1.68 |
| BCD-1-24               | 160 | 0.059920 | 0.001546 | 0.282593 | 0.000020 | 0.282588 | -3.0  | 0.4 | 0.95 | 1.39 |
| BCD-1-25               | 161 | 0.032759 | 0.000917 | 0.282386 | 0.000015 | 0.282384 | -10.2 | 0.2 | 1.22 | 1.85 |
| BCD-1-26               | 454 | 0.065280 | 0.002215 | 0.282492 | 0.000028 | 0.282474 | -0.6  | 0.7 | 1.11 | 1.46 |
| BCD-1-27               | 162 | 0.030634 | 0.000892 | 0.282542 | 0.000024 | 0.282539 | -4.7  | 0.6 | 1.00 | 1.50 |
| BCD-1-30               | 161 | 0.018250 | 0.000529 | 0.282333 | 0.000017 | 0.282332 | -12.0 | 0.3 | 1.28 | 1.97 |
| <i>BCD-6 (Granite)</i> |     |          |          |          |          |          |       |     |      |      |
| BCD-6-2                | 160 | 0.108054 | 0.003016 | 0.282474 | 0.000017 | 0.282465 | -7.3  | 0.3 | 1.16 | 1.67 |
| BCD-6-3                | 161 | 0.034595 | 0.000993 | 0.282411 | 0.000015 | 0.282408 | -9.3  | 0.2 | 1.19 | 1.79 |
| BCD-6-4                | 161 | 0.005731 | 0.000157 | 0.282364 | 0.000016 | 0.282364 | -10.9 | 0.3 | 1.23 | 1.90 |
| BCD-6-5                | 111 | 0.023569 | 0.000686 | 0.282489 | 0.000016 | 0.282488 | -7.6  | 0.3 | 1.07 | 1.65 |
| BCD-6-6                | 112 | 0.086951 | 0.002250 | 0.282560 | 0.000023 | 0.282555 | -5.2  | 0.5 | 1.01 | 1.50 |
| BCD-6-8                | 112 | 0.016319 | 0.000421 | 0.282620 | 0.000017 | 0.282619 | -3.0  | 0.3 | 0.88 | 1.36 |
| BCD-6-9                | 161 | 0.033210 | 0.001000 | 0.282772 | 0.000017 | 0.282769 | 3.4   | 0.3 | 0.68 | 0.99 |
| BCD-6-10               | 109 | 0.037758 | 0.001013 | 0.282574 | 0.000022 | 0.282572 | -4.7  | 0.5 | 0.96 | 1.46 |
| BCD-6-12               | 113 | 0.018571 | 0.000544 | 0.282454 | 0.000017 | 0.282453 | -8.8  | 0.3 | 1.11 | 1.73 |

Continued

|                        |     |          |          |          |          |          |       |     |      |      |
|------------------------|-----|----------|----------|----------|----------|----------|-------|-----|------|------|
| BCD-6-13               | 451 | 0.121083 | 0.003185 | 0.282435 | 0.000021 | 0.282408 | -2.9  | 0.5 | 1.23 | 1.61 |
| BCD-6-14               | 454 | 0.019339 | 0.000513 | 0.282461 | 0.000017 | 0.282457 | -1.2  | 0.3 | 1.10 | 1.50 |
| BCD-6-15               | 112 | 0.017284 | 0.000490 | 0.282508 | 0.000017 | 0.282507 | -6.9  | 0.3 | 1.04 | 1.61 |
| BCD-6-18               | 452 | 0.105899 | 0.002828 | 0.282506 | 0.000023 | 0.282482 | -0.3  | 0.5 | 1.11 | 1.45 |
| BCD-6-19               | 454 | 0.038278 | 0.001108 | 0.282472 | 0.000016 | 0.282463 | -0.9  | 0.3 | 1.11 | 1.49 |
| BCD-6-20               | 862 | 0.048326 | 0.001294 | 0.282406 | 0.000020 | 0.282385 | 5.4   | 0.4 | 1.20 | 1.40 |
| <i>BCN-1 (Granite)</i> |     |          |          |          |          |          |       |     |      |      |
| BCN-1-2                | 121 | 0.014793 | 0.000462 | 0.282451 | 0.000015 | 0.282450 | -8.7  | 0.3 | 1.12 | 1.73 |
| BCN-1-3                | 121 | 0.015344 | 0.000455 | 0.282512 | 0.000017 | 0.282511 | -6.6  | 0.3 | 1.03 | 1.59 |
| BCN-1-5                | 121 | 0.024656 | 0.000671 | 0.282457 | 0.000020 | 0.282455 | -8.5  | 0.4 | 1.11 | 1.72 |
| BCN-1-6                | 121 | 0.015853 | 0.000485 | 0.282492 | 0.000020 | 0.282491 | -7.3  | 0.4 | 1.06 | 1.64 |
| BCN-1-9                | 121 | 0.012930 | 0.000406 | 0.282454 | 0.000017 | 0.282453 | -8.6  | 0.3 | 1.11 | 1.72 |
| BCN-1-10               | 121 | 0.011864 | 0.000371 | 0.282478 | 0.000016 | 0.282478 | -7.8  | 0.3 | 1.08 | 1.67 |
| BCN-1-12               | 120 | 0.030427 | 0.000825 | 0.282461 | 0.000021 | 0.282459 | -8.4  | 0.5 | 1.11 | 1.71 |
| BCN-1-13               | 120 | 0.017984 | 0.000534 | 0.282523 | 0.000016 | 0.282522 | -6.2  | 0.3 | 1.02 | 1.57 |
| BCN-1-14               | 121 | 0.052799 | 0.001451 | 0.282476 | 0.000021 | 0.282472 | -7.9  | 0.5 | 1.11 | 1.68 |
| <i>BCN-2 (Granite)</i> |     |          |          |          |          |          |       |     |      |      |
| BCN-2-3                | 115 | 0.020686 | 0.000559 | 0.282473 | 0.000018 | 0.282472 | -8.1  | 0.3 | 1.09 | 1.68 |
| BCN-2-4                | 114 | 0.015172 | 0.000462 | 0.282470 | 0.000016 | 0.282469 | -8.2  | 0.3 | 1.09 | 1.69 |
| BCN-2-5                | 128 | 0.038786 | 0.001020 | 0.282474 | 0.000021 | 0.282472 | -7.8  | 0.5 | 1.10 | 1.67 |
| BCN-2-7                | 296 | 0.026228 | 0.000724 | 0.282290 | 0.000019 | 0.282286 | -10.7 | 0.4 | 1.35 | 1.98 |
| BCN-2-8                | 114 | 0.022539 | 0.000651 | 0.282450 | 0.000020 | 0.282449 | -8.9  | 0.4 | 1.12 | 1.73 |
| BCN-2-9                | 114 | 0.045531 | 0.001173 | 0.282506 | 0.000024 | 0.282504 | -7.0  | 0.6 | 1.06 | 1.61 |
| BCN-2-11               | 113 | 0.049419 | 0.001260 | 0.282513 | 0.000021 | 0.282510 | -6.8  | 0.5 | 1.05 | 1.60 |

Continued

|                       |      |          |          |          |          |          |       |      |      |      |
|-----------------------|------|----------|----------|----------|----------|----------|-------|------|------|------|
| BCN-2-12              | 112  | 0.069384 | 0.001743 | 0.282444 | 0.000022 | 0.282441 | -9.3  | 0.5  | 1.16 | 1.75 |
| BCN-2-13              | 113  | 0.026800 | 0.000762 | 0.282448 | 0.000014 | 0.282446 | -9.0  | 0.2  | 1.13 | 1.74 |
| BCN-2-17              | 112  | 0.016145 | 0.000483 | 0.282438 | 0.000016 | 0.282437 | -9.4  | 0.3  | 1.13 | 1.76 |
| BCN-2-18              | 113  | 0.024252 | 0.000664 | 0.282464 | 0.000018 | 0.282462 | -8.5  | 0.4  | 1.10 | 1.71 |
| BCN-2-20              | 112  | 0.036575 | 0.000934 | 0.282507 | 0.000019 | 0.282505 | -7.0  | 0.4  | 1.05 | 1.61 |
| BCN-2-22              | 129  | 0.029531 | 0.000773 | 0.282485 | 0.000020 | 0.282483 | -7.4  | 0.4  | 1.08 | 1.65 |
| BCN-2-23              | 112  | 0.011263 | 0.000364 | 0.282420 | 0.000015 | 0.282419 | -10.0 | 0.3  | 1.16 | 1.80 |
| <i>TL-3 (Granite)</i> |      |          |          |          |          |          |       |      |      |      |
| TL-3-1                | 111  | 0.048552 | 0.001312 | 0.282530 | 0.000017 | 0.282528 | -6.2  | 0.3  | 1.03 | 1.56 |
| TL-3-3                | 110  | 0.015936 | 0.000503 | 0.282465 | 0.000017 | 0.282464 | -8.5  | 0.3  | 1.10 | 1.70 |
| TL-3-4                | 109  | 0.028029 | 0.000768 | 0.282539 | 0.000018 | 0.282538 | -5.9  | 0.4  | 1.00 | 1.54 |
| TL-3-6                | 160  | 0.040530 | 0.000960 | 0.282355 | 0.000015 | 0.282353 | -11.3 | 0.2  | 1.26 | 1.92 |
| TL-3-8                | 109  | 0.024554 | 0.000771 | 0.282478 | 0.000021 | 0.282476 | -8.1  | 0.5  | 1.09 | 1.68 |
| TL-3-9                | 112  | 0.028813 | 0.000828 | 0.282455 | 0.000020 | 0.282453 | -8.8  | 0.4  | 1.12 | 1.73 |
| TL-3-12               | 110  | 0.015923 | 0.000475 | 0.282465 | 0.000014 | 0.282464 | -8.5  | 0.2  | 1.10 | 1.70 |
| TL-3-14               | 111  | 0.026131 | 0.000824 | 0.282291 | 0.000021 | 0.282290 | -14.6 | 0.5  | 1.35 | 2.09 |
| TL-3-15               | 1354 | 0.048631 | 0.001470 | 0.282067 | 0.000027 | 0.282030 | 3.8   | 0.67 | 1.69 | 1.88 |
| TL-3-17               | 110  | 0.027991 | 0.000767 | 0.282515 | 0.000017 | 0.282513 | -6.7  | 0.3  | 1.04 | 1.59 |
| TL-3-18               | 111  | 0.021058 | 0.000601 | 0.282483 | 0.000017 | 0.282481 | -7.8  | 0.3  | 1.08 | 1.66 |
| TL-3-20               | 109  | 0.020288 | 0.000608 | 0.282497 | 0.000018 | 0.282496 | -7.4  | 0.4  | 1.06 | 1.63 |
| TL-3-21               | 110  | 0.035206 | 0.000947 | 0.282512 | 0.000021 | 0.282510 | -6.9  | 0.5  | 1.05 | 1.60 |
| TL-3-22               | 110  | 0.023338 | 0.000629 | 0.282463 | 0.000016 | 0.282462 | -8.6  | 0.3  | 1.10 | 1.71 |
| TL-3-24               | 111  | 0.043267 | 0.000985 | 0.282424 | 0.000019 | 0.282422 | -9.9  | 0.4  | 1.17 | 1.80 |
