# Supplementary material for: Early Cretaceous Granitoids Magmatism in the Nagqu Area, Northern Tibet: Constraints on the Timing of the Lhasa–Qiangtang Collision
Source: MDPI journal article supplement (doi:10.3390/min12080933), 2022-07-24
Supplement: s1 [file s1]

Table S1 Zircon LA-ICP-MS U–Pb isotopic data for the Yilashan and Amdo granitoids in the Nagqu area

| Sample                             | Element |      | Th/U | Ratios                               |         |                                     |         |                                     |         | Ages (Ma)                            |       |                                     |      |                                     |      |
|------------------------------------|---------|------|------|--------------------------------------|---------|-------------------------------------|---------|-------------------------------------|---------|--------------------------------------|-------|-------------------------------------|------|-------------------------------------|------|
|                                    | (ppm)   |      |      |                                      |         |                                     |         |                                     |         |                                      |       |                                     |      |                                     |      |
|                                    | Th      | U    |      | <sup>207</sup> Pb/ <sup>206</sup> Pb | 1σ      | <sup>207</sup> Pb/ <sup>235</sup> U | 1σ      | <sup>206</sup> Pb/ <sup>238</sup> U | 1σ      | <sup>207</sup> Pb/ <sup>206</sup> Pb | 1σ    | <sup>207</sup> Pb/ <sup>235</sup> U | 1σ   | <sup>206</sup> Pb/ <sup>238</sup> U | 1σ   |
| YLSZ-9 (Quartz diorite-porphyrite) |         |      |      |                                      |         |                                     |         |                                     |         |                                      |       |                                     |      |                                     |      |
| YLSZ-9-01                          | 143     | 304  | 0.5  | 0.16525                              | 0.00468 | 11.35413                            | 0.33788 | 0.49556                             | 0.00796 | 2510.2                               | 47.8  | 2552.7                              | 27.8 | 2594.7                              | 34.3 |
| YLSZ-9-02                          | 149     | 316  | 0.5  | 0.07277                              | 0.00248 | 1.68262                             | 0.05492 | 0.16705                             | 0.00243 | 1009.3                               | 69.6  | 1002.0                              | 20.8 | 995.8                               | 13.4 |
| YLSZ-9-03                          | 83      | 460  | 0.2  | 0.05076                              | 0.00338 | 0.19367                             | 0.01352 | 0.02761                             | 0.00073 | 231.6                                | 149.1 | 179.8                               | 11.5 | 175.6                               | 4.6  |
| YLSZ-9-04                          | 332     | 408  | 0.8  | 0.09532                              | 0.00259 | 3.50682                             | 0.09954 | 0.26471                             | 0.00361 | 1544.5                               | 50.8  | 1528.8                              | 22.5 | 1513.9                              | 18.4 |
| YLSZ-9-05                          | 3049    | 2167 | 1.4  | 0.04724                              | 0.00219 | 0.10947                             | 0.00482 | 0.01680                             | 0.00031 | 61.2                                 | 107.4 | 105.5                               | 4.4  | 107.4                               | 1.9  |
| YLSZ-9-06                          | 2347    | 1100 | 2.1  | 0.04734                              | 0.00308 | 0.11137                             | 0.00675 | 0.01726                             | 0.00038 | 64.9                                 | 148.1 | 107.2                               | 6.2  | 110.3                               | 2.4  |
| YLSZ-9-08                          | 1568    | 341  | 4.6  | 0.06025                              | 0.00268 | 0.76961                             | 0.03728 | 0.09180                             | 0.00153 | 613.0                                | 91.7  | 579.5                               | 21.4 | 566.1                               | 9.0  |
| YLSZ-9-09                          | 2924    | 1523 | 1.9  | 0.04962                              | 0.00275 | 0.11607                             | 0.00707 | 0.01686                             | 0.00041 | 176.0                                | 129.6 | 111.5                               | 6.4  | 107.8                               | 2.6  |
| YLSZ-9-10                          | 5404    | 3265 | 1.7  | 0.04735                              | 0.00172 | 0.10906                             | 0.00409 | 0.01673                             | 0.00031 | 77.9                                 | 72.2  | 105.1                               | 3.7  | 106.9                               | 2.0  |
| YLSZ-9-11                          | 1303    | 846  | 1.5  | 0.04669                              | 0.00295 | 0.10522                             | 0.00690 | 0.01638                             | 0.00036 | 31.6                                 | 157.4 | 101.6                               | 6.3  | 104.7                               | 2.3  |
| YLSZ-9-12                          | 105     | 119  | 0.9  | 0.16314                              | 0.00498 | 10.28969                            | 0.32664 | 0.45955                             | 0.00904 | 2488.6                               | 51.5  | 2461.2                              | 29.4 | 2437.6                              | 40.0 |
| YLSZ-9-13                          | 1613    | 880  | 1.8  | 0.04669                              | 0.00278 | 0.10870                             | 0.00631 | 0.01705                             | 0.00030 | 35.3                                 | 133.3 | 104.8                               | 5.8  | 109.0                               | 1.9  |
| YLSZ-9-14                          | 78      | 196  | 0.4  | 0.06070                              | 0.00339 | 0.77094                             | 0.04336 | 0.09241                             | 0.00180 | 627.8                                | 122.2 | 580.3                               | 24.9 | 569.8                               | 10.6 |
| YLSZ-9-15                          | 547     | 393  | 1.4  | 0.05359                              | 0.00373 | 0.12635                             | 0.00898 | 0.01697                             | 0.00044 | 353.8                                | 159.2 | 120.8                               | 8.1  | 108.5                               | 2.8  |
| YLSZ-9-16                          | 244     | 321  | 0.8  | 0.05797                              | 0.00272 | 0.73353                             | 0.03620 | 0.09167                             | 0.00192 | 527.8                                | 97.2  | 558.6                               | 21.2 | 565.4                               | 11.4 |
| YLSZ-9-17                          | 1118    | 881  | 1.3  | 0.04699                              | 0.00287 | 0.11183                             | 0.00720 | 0.01712                             | 0.00039 | 55.7                                 | 131.5 | 107.6                               | 6.6  | 109.4                               | 2.5  |
| YLSZ-9-18                          | 147     | 707  | 0.2  | 0.05951                              | 0.00221 | 0.75234                             | 0.02782 | 0.09184                             | 0.00163 | 587.1                                | 81.5  | 569.6                               | 16.1 | 566.4                               | 9.6  |
| YLSZ-9-19                          | 84      | 128  | 0.7  | 0.09129                              | 0.00355 | 3.17463                             | 0.13741 | 0.25052                             | 0.00446 | 1453.7                               | 74.1  | 1451.0                              | 33.4 | 1441.1                              | 23.0 |
| YLSZ-9-20                          | 101     | 229  | 0.4  | 0.07173                              | 0.00306 | 1.66311                             | 0.07850 | 0.16696                             | 0.00351 | 988.9                                | 81.3  | 994.6                               | 29.9 | 995.3                               | 19.4 |
| YLSZ-9-21                          | 804     | 476  | 1.7  | 0.05383                              | 0.00412 | 0.12638                             | 0.00917 | 0.01716                             | 0.00055 | 364.9                                | 169.4 | 120.8                               | 8.3  | 109.7                               | 3.5  |
| YLSZ-9-22                          | 49      | 369  | 0.1  | 0.05731                              | 0.00235 | 0.72141                             | 0.02977 | 0.09147                             | 0.00178 | 501.9                                | 90.7  | 551.5                               | 17.6 | 564.2                               | 10.5 |

Continued

|                                            |      |       |     |         |         |          |         |         |         |        |        |        |      |        |      |
|--------------------------------------------|------|-------|-----|---------|---------|----------|---------|---------|---------|--------|--------|--------|------|--------|------|
| YLSZ-9-23                                  | 1694 | 1059  | 1.6 | 0.07210 | 0.00250 | 1.66111  | 0.06919 | 0.16652 | 0.00417 | 988.6  | 70.4   | 993.8  | 26.4 | 992.9  | 23.0 |
| YLSZ-9-24                                  | 167  | 268   | 0.6 | 0.05798 | 0.00286 | 0.73265  | 0.03728 | 0.09197 | 0.00171 | 527.8  | 109.2  | 558.1  | 21.8 | 567.2  | 10.1 |
| YLSZ-9-25                                  | 562  | 389   | 1.4 | 0.08185 | 0.00341 | 2.43510  | 0.10754 | 0.21533 | 0.00451 | 1242.6 | 81.5   | 1253.0 | 31.8 | 1257.1 | 23.9 |
| <i>YLSZ-10 (Quartz diorite-porphyrite)</i> |      |       |     |         |         |          |         |         |         |        |        |        |      |        |      |
| YLSZ-10-01                                 | 195  | 1017  | 0.2 | 0.11130 | 0.00356 | 5.02825  | 0.18315 | 0.32466 | 0.00753 | 1820.7 | 58.0   | 1824.1 | 30.9 | 1812.5 | 36.7 |
| YLSZ-10-02                                 | 3147 | 1545  | 2.0 | 0.04743 | 0.00304 | 0.11160  | 0.00709 | 0.01680 | 0.00032 | 77.9   | 138.9  | 107.4  | 6.5  | 107.4  | 2.0  |
| YLSZ-10-03                                 | 926  | 663   | 1.4 | 0.05370 | 0.00393 | 0.12471  | 0.00962 | 0.01655 | 0.00038 | 366.7  | 166.6  | 119.3  | 8.7  | 105.8  | 2.4  |
| YLSZ-10-04                                 | 55   | 57    | 1.0 | 0.28989 | 0.01616 | 28.23322 | 1.62455 | 0.69862 | 0.01765 | 3417.0 | 86.7   | 3427.2 | 56.5 | 3415.4 | 67.0 |
| YLSZ-10-07                                 | 4674 | 2099  | 2.2 | 0.05327 | 0.00347 | 0.12483  | 0.00794 | 0.01694 | 0.00031 | 338.9  | 148.1  | 119.4  | 7.2  | 108.3  | 2.0  |
| YLSZ-10-08                                 | 413  | 460   | 0.9 | 0.07523 | 0.00389 | 1.88990  | 0.09872 | 0.18172 | 0.00401 | 1075.9 | 103.7  | 1077.5 | 34.7 | 1076.4 | 21.9 |
| YLSZ-10-09                                 | 122  | 230   | 0.5 | 0.06529 | 0.00349 | 0.81426  | 0.04113 | 0.09153 | 0.00215 | 783.3  | 79.5   | 604.8  | 23.0 | 564.6  | 12.7 |
| YLSZ-10-10                                 | 212  | 144   | 1.5 | 0.07764 | 0.00362 | 1.94860  | 0.08971 | 0.18228 | 0.00313 | 1138.9 | 92.6   | 1098.0 | 30.9 | 1079.4 | 17.1 |
| YLSZ-10-11                                 | 111  | 216   | 0.5 | 0.08788 | 0.00253 | 2.99897  | 0.09326 | 0.24665 | 0.00378 | 1388.9 | 55.6   | 1407.4 | 23.7 | 1421.2 | 19.6 |
| YLSZ-10-12                                 | 371  | 935   | 0.4 | 0.05816 | 0.00174 | 0.73337  | 0.02257 | 0.09167 | 0.00183 | 600.0  | 60.2   | 558.5  | 13.2 | 565.4  | 10.8 |
| YLSZ-10-13                                 | 245  | 637   | 0.4 | 0.07352 | 0.00231 | 0.93696  | 0.03912 | 0.09145 | 0.00227 | 1027.8 | 67.6   | 671.3  | 20.5 | 564.1  | 13.4 |
| YLSZ-10-14                                 | 18   | 199   | 0.1 | 0.15896 | 0.00507 | 8.93810  | 0.30954 | 0.40651 | 0.00764 | 2455.6 | 53.6   | 2331.7 | 31.7 | 2198.9 | 35.1 |
| YLSZ-10-15                                 | 49   | 864   | 0.1 | 0.07026 | 0.00232 | 1.51408  | 0.05707 | 0.15500 | 0.00325 | 1000.0 | 72.4   | 936.1  | 23.1 | 928.9  | 18.1 |
| YLSZ-10-17                                 | 210  | 348   | 0.6 | 0.07456 | 0.00240 | 1.83096  | 0.06502 | 0.17664 | 0.00278 | 1057.4 | 64.8   | 1056.6 | 23.3 | 1048.6 | 15.2 |
| YLSZ-10-18                                 | 131  | 194   | 0.7 | 0.16790 | 0.00416 | 11.01443 | 0.27968 | 0.47379 | 0.00727 | 2536.7 | 41.4   | 2524.4 | 23.7 | 2500.2 | 31.8 |
| YLSZ-10-19                                 | 241  | 365   | 0.7 | 0.05662 | 0.00225 | 0.62243  | 0.02543 | 0.07960 | 0.00152 | 476.0  | 87.0   | 491.4  | 15.9 | 493.8  | 9.1  |
| YLSZ-10-20                                 | 1064 | 824   | 1.3 | 0.04614 | 0.00276 | 0.10886  | 0.00647 | 0.01706 | 0.00031 | 400.1  | -257.4 | 104.9  | 5.9  | 109.1  | 1.9  |
| YLSZ-10-22                                 | 842  | 603   | 1.4 | 0.04965 | 0.00290 | 0.11992  | 0.00670 | 0.01736 | 0.00042 | 189.0  | 137.0  | 115.0  | 6.1  | 111.0  | 2.7  |
| YLSZ-10-23                                 | 6967 | 12806 | 0.5 | 0.06017 | 0.00168 | 0.14523  | 0.00416 | 0.01693 | 0.00041 | 609.3  | 93.5   | 137.7  | 3.7  | 108.3  | 2.6  |

Continued

|                            |      |      |     |         |         |         |         |         |         |       |        |       |      |       |     |
|----------------------------|------|------|-----|---------|---------|---------|---------|---------|---------|-------|--------|-------|------|-------|-----|
| YLSZ-10-24                 | 1246 | 1028 | 1.2 | 0.05511 | 0.00746 | 0.13489 | 0.01672 | 0.01748 | 0.00055 | 416.7 | 305.5  | 128.5 | 15.0 | 111.7 | 3.5 |
| YLSZ-10-25                 | 1278 | 872  | 1.5 | 0.05484 | 0.00352 | 0.13673 | 0.00900 | 0.01735 | 0.00065 | 405.6 | 144.4  | 130.1 | 8.0  | 110.9 | 4.1 |
| YLSZ-10-26                 | 1004 | 752  | 1.3 | 0.04889 | 0.00362 | 0.11820 | 0.00848 | 0.01702 | 0.00074 | 142.7 | 166.6  | 113.4 | 7.7  | 108.8 | 4.7 |
| <i>YLSS-4 (Granophyre)</i> |      |      |     |         |         |         |         |         |         |       |        |       |      |       |     |
| YLSS-4-01                  | 367  | 320  | 1.1 | 0.04615 | 0.00385 | 0.11021 | 0.00867 | 0.01740 | 0.00030 | 5.7   | 188.9  | 106.2 | 7.9  | 111.2 | 1.9 |
| YLSS-4-02                  | 239  | 202  | 1.2 | 0.04644 | 0.00515 | 0.11201 | 0.01162 | 0.01752 | 0.00037 | 20.5  | 312.9  | 107.8 | 10.6 | 111.9 | 2.4 |
| YLSS-4-03                  | 456  | 406  | 1.1 | 0.04723 | 0.00329 | 0.11310 | 0.00753 | 0.01745 | 0.00030 | 61.2  | 159.2  | 108.8 | 6.9  | 111.5 | 1.9 |
| YLSS-4-04                  | 339  | 319  | 1.1 | 0.04931 | 0.00381 | 0.11625 | 0.00843 | 0.01750 | 0.00033 | 161.2 | 183.3  | 111.7 | 7.7  | 111.8 | 2.1 |
| YLSS-4-05                  | 211  | 192  | 1.1 | 0.05161 | 0.00425 | 0.12129 | 0.00897 | 0.01725 | 0.00038 | 333.4 | 188.9  | 116.2 | 8.1  | 110.2 | 2.4 |
| YLSS-4-07                  | 288  | 289  | 1.0 | 0.05346 | 0.00387 | 0.12475 | 0.00844 | 0.01742 | 0.00031 | 350.1 | 164.8  | 119.4 | 7.6  | 111.4 | 2.0 |
| YLSS-4-11                  | 509  | 434  | 1.2 | 0.04833 | 0.00309 | 0.11540 | 0.00708 | 0.01751 | 0.00027 | 122.3 | 138.9  | 110.9 | 6.4  | 111.9 | 1.7 |
| YLSS-4-12                  | 467  | 418  | 1.1 | 0.05073 | 0.00346 | 0.11952 | 0.00829 | 0.01734 | 0.00033 | 227.8 | 162.0  | 114.6 | 7.5  | 110.8 | 2.1 |
| YLSS-4-13                  | 526  | 516  | 1.0 | 0.04613 | 0.00248 | 0.11312 | 0.00602 | 0.01764 | 0.00026 | 400.1 | -272.2 | 108.8 | 5.5  | 112.7 | 1.6 |
| YLSS-4-14                  | 218  | 219  | 1.0 | 0.04885 | 0.00425 | 0.11534 | 0.00971 | 0.01757 | 0.00037 | 139.0 | 192.6  | 110.8 | 8.8  | 112.3 | 2.3 |
| YLSS-4-19                  | 339  | 286  | 1.2 | 0.04633 | 0.00342 | 0.11206 | 0.00722 | 0.01750 | 0.00033 | 13.1  | 170.4  | 107.8 | 6.6  | 111.8 | 2.1 |
| YLSS-4-20                  | 592  | 504  | 1.2 | 0.04989 | 0.00322 | 0.12090 | 0.00680 | 0.01725 | 0.00026 | 190.8 | 156.5  | 115.9 | 6.2  | 110.2 | 1.7 |
| YLSS-4-22                  | 620  | 424  | 1.5 | 0.04831 | 0.00299 | 0.11955 | 0.00668 | 0.01741 | 0.00024 | 122.3 | 131.5  | 114.7 | 6.1  | 111.3 | 1.5 |
| YLSS-4-23                  | 346  | 291  | 1.2 | 0.04659 | 0.00369 | 0.11261 | 0.00807 | 0.01738 | 0.00031 | 27.9  | 181.5  | 108.3 | 7.4  | 111.1 | 2.0 |

Continued

*BCD-1 (Granite)*

|          |      |      |     |         |         |         |         |         |         |        |       |        |      |        |      |
|----------|------|------|-----|---------|---------|---------|---------|---------|---------|--------|-------|--------|------|--------|------|
| BCD-1-01 | 92   | 66   | 1.4 | 0.08197 | 0.00724 | 2.91411 | 0.18658 | 0.24643 | 0.00732 | 1255.6 | 174.1 | 1385.6 | 48.4 | 1420.1 | 37.8 |
| BCD-1-02 | 203  | 438  | 0.5 | 0.05434 | 0.00402 | 0.55802 | 0.03141 | 0.07246 | 0.00238 | 387.1  | 166.7 | 450.2  | 20.5 | 451.0  | 14.3 |
| BCD-1-03 | 295  | 589  | 0.5 | 0.05383 | 0.00333 | 0.54882 | 0.02823 | 0.07253 | 0.00254 | 364.9  | 140.7 | 444.2  | 18.5 | 451.4  | 15.3 |
| BCD-1-04 | 182  | 399  | 0.5 | 0.05319 | 0.00266 | 0.54052 | 0.02289 | 0.07255 | 0.00222 | 344.5  | 117.6 | 438.8  | 15.1 | 451.5  | 13.3 |
| BCD-1-05 | 278  | 1102 | 0.3 | 0.05782 | 0.00225 | 0.58593 | 0.02349 | 0.07243 | 0.00221 | 524.1  | 85.2  | 468.3  | 15.0 | 450.8  | 13.3 |
| BCD-1-06 | 131  | 797  | 0.2 | 0.04913 | 0.00191 | 0.50163 | 0.02416 | 0.07310 | 0.00284 | 153.8  | 90.7  | 412.8  | 16.3 | 454.8  | 17.1 |
| BCD-1-07 | 82   | 871  | 0.1 | 0.04939 | 0.00168 | 0.17459 | 0.00729 | 0.02547 | 0.00078 | 164.9  | 79.6  | 163.4  | 6.3  | 162.1  | 4.9  |
| BCD-1-08 | 67   | 727  | 0.1 | 0.05848 | 0.00171 | 0.57704 | 0.02203 | 0.07198 | 0.00255 | 546.3  | 63.0  | 462.6  | 14.2 | 448.1  | 15.3 |
| BCD-1-10 | 172  | 605  | 0.3 | 0.05340 | 0.00169 | 0.53305 | 0.02133 | 0.07233 | 0.00249 | 346.4  | 72.2  | 433.8  | 14.1 | 450.2  | 15.0 |
| BCD-1-11 | 169  | 1079 | 0.2 | 0.05592 | 0.00153 | 0.55540 | 0.01882 | 0.07230 | 0.00242 | 450.0  | 61.1  | 448.5  | 12.3 | 450.0  | 14.6 |
| BCD-1-13 | 1008 | 1386 | 0.7 | 0.05479 | 0.00190 | 0.54302 | 0.02285 | 0.07230 | 0.00280 | 466.7  | 77.8  | 440.4  | 15.0 | 450.0  | 16.8 |
| BCD-1-14 | 646  | 1652 | 0.4 | 0.06652 | 0.00199 | 0.66640 | 0.02508 | 0.07238 | 0.00250 | 833.3  | 62.2  | 518.5  | 15.3 | 450.5  | 15.0 |
| BCD-1-17 | 284  | 699  | 0.4 | 0.05749 | 0.00186 | 0.57937 | 0.02754 | 0.07233 | 0.00273 | 509.3  | 75.0  | 464.1  | 17.7 | 450.2  | 16.4 |
| BCD-1-18 | 429  | 1132 | 0.4 | 0.04866 | 0.00197 | 0.11373 | 0.00541 | 0.01700 | 0.00065 | 131.6  | 99.1  | 109.4  | 4.9  | 108.7  | 4.1  |
| BCD-1-20 | 280  | 1639 | 0.2 | 0.06083 | 0.00252 | 0.60883 | 0.03380 | 0.07216 | 0.00273 | 633.0  | 88.9  | 482.8  | 21.3 | 449.1  | 16.4 |
| BCD-1-21 | 237  | 1132 | 0.2 | 0.06067 | 0.00193 | 0.60033 | 0.02839 | 0.07239 | 0.00317 | 627.8  | 63.9  | 477.4  | 18.0 | 450.5  | 19.1 |
| BCD-1-22 | 1300 | 1270 | 1.0 | 0.04843 | 0.00187 | 0.11630 | 0.00595 | 0.01750 | 0.00065 | 120.5  | 88.0  | 111.7  | 5.4  | 111.9  | 4.1  |
| BCD-1-23 | 252  | 448  | 0.6 | 0.06771 | 0.00246 | 0.67208 | 0.02764 | 0.07267 | 0.00233 | 861.1  | 74.8  | 522.0  | 16.8 | 452.2  | 14.0 |

Continued

|                        |      |      |     |         |         |         |         |         |         |       |       |       |      |       |      |
|------------------------|------|------|-----|---------|---------|---------|---------|---------|---------|-------|-------|-------|------|-------|------|
| BCD-1-24               | 811  | 546  | 1.5 | 0.04967 | 0.00198 | 0.17026 | 0.00865 | 0.02519 | 0.00096 | 189.0 | 125.0 | 159.6 | 7.5  | 160.4 | 6.1  |
| BCD-1-25               | 172  | 2285 | 0.1 | 0.05139 | 0.00188 | 0.17708 | 0.00825 | 0.02530 | 0.00103 | 257.5 | 83.3  | 165.5 | 7.1  | 161.0 | 6.5  |
| BCD-1-26               | 809  | 1406 | 0.6 | 0.05960 | 0.00180 | 0.59537 | 0.02531 | 0.07292 | 0.00296 | 590.8 | 66.7  | 474.3 | 16.1 | 453.8 | 17.8 |
| BCD-1-27               | 400  | 869  | 0.5 | 0.05835 | 0.00347 | 0.19128 | 0.01240 | 0.02547 | 0.00159 | 542.6 | 163.9 | 177.7 | 10.6 | 162.1 | 10.0 |
| BCD-1-28               | 710  | 1161 | 0.6 | 0.04944 | 0.00240 | 0.11484 | 0.00542 | 0.01739 | 0.00078 | 168.6 | 114.8 | 110.4 | 4.9  | 111.2 | 4.9  |
| BCD-1-30               | 107  | 958  | 0.1 | 0.05351 | 0.00178 | 0.18678 | 0.00835 | 0.02522 | 0.00100 | 350.1 | 80.5  | 173.9 | 7.1  | 160.5 | 6.3  |
| <i>BCD-6 (Granite)</i> |      |      |     |         |         |         |         |         |         |       |       |       |      |       |      |
| BCD-6-02               | 278  | 3035 | 0.1 | 0.04790 | 0.00133 | 0.16770 | 0.00494 | 0.02520 | 0.00041 | 94.5  | 66.7  | 157.4 | 4.3  | 160.4 | 2.6  |
| BCD-6-03               | 158  | 2788 | 0.1 | 0.04931 | 0.00146 | 0.17352 | 0.00512 | 0.02533 | 0.00033 | 161.2 | 65.7  | 162.5 | 4.4  | 161.2 | 2.1  |
| BCD-6-04               | 86   | 426  | 0.2 | 0.04768 | 0.00335 | 0.16559 | 0.01144 | 0.02527 | 0.00043 | 83.4  | 159.2 | 155.6 | 10.0 | 160.9 | 2.7  |
| BCD-6-05               | 566  | 1094 | 0.5 | 0.04706 | 0.00273 | 0.11313 | 0.00619 | 0.01741 | 0.00026 | 53.8  | 129.6 | 108.8 | 5.6  | 111.3 | 1.7  |
| BCD-6-06               | 3099 | 768  | 4.0 | 0.04890 | 0.00325 | 0.11677 | 0.00728 | 0.01753 | 0.00040 | 142.7 | 157.4 | 112.1 | 6.6  | 112.0 | 2.5  |
| BCD-6-07               | 252  | 598  | 0.4 | 0.05719 | 0.00198 | 0.57952 | 0.02617 | 0.07254 | 0.00224 | 498.2 | 75.9  | 464.2 | 16.8 | 451.5 | 13.5 |
| BCD-6-08               | 555  | 3105 | 0.2 | 0.04791 | 0.00152 | 0.11675 | 0.00392 | 0.01752 | 0.00028 | 94.5  | 75.9  | 112.1 | 3.6  | 112.0 | 1.8  |
| BCD-6-09               | 415  | 503  | 0.8 | 0.05034 | 0.00379 | 0.17300 | 0.01250 | 0.02529 | 0.00061 | 209.3 | 171.3 | 162.0 | 10.8 | 161.0 | 3.9  |
| BCD-6-10               | 1894 | 793  | 2.4 | 0.04619 | 0.00285 | 0.10690 | 0.00598 | 0.01711 | 0.00043 | 5.7   | 144.4 | 103.1 | 5.5  | 109.3 | 2.7  |
| BCD-6-11               | 123  | 299  | 0.4 | 0.06237 | 0.00293 | 0.61907 | 0.03493 | 0.07232 | 0.00258 | 687.1 | 100.0 | 489.3 | 21.9 | 450.1 | 15.5 |
| BCD-6-12               | 468  | 857  | 0.5 | 0.05326 | 0.00268 | 0.12795 | 0.00603 | 0.01763 | 0.00033 | 338.9 | 114.8 | 122.3 | 5.4  | 112.7 | 2.1  |
| BCD-6-13               | 159  | 1306 | 0.1 | 0.05874 | 0.00169 | 0.59067 | 0.01924 | 0.07250 | 0.00115 | 566.7 | 63.0  | 471.3 | 12.3 | 451.2 | 6.9  |
| BCD-6-14               | 299  | 611  | 0.5 | 0.05737 | 0.00210 | 0.58292 | 0.02605 | 0.07297 | 0.00173 | 505.6 | 75.0  | 466.3 | 16.7 | 454.0 | 10.4 |
| BCD-6-15               | 396  | 755  | 0.5 | 0.04936 | 0.00317 | 0.11870 | 0.00731 | 0.01755 | 0.00031 | 164.9 | 150.0 | 113.9 | 6.6  | 112.1 | 2.0  |
| BCD-6-16               | 109  | 206  | 0.5 | 0.06022 | 0.00291 | 0.60975 | 0.03268 | 0.07305 | 0.00176 | 613.0 | 110.2 | 483.4 | 20.6 | 454.5 | 10.6 |

Continued

|                        |      |      |     |         |         |         |         |         |         |        |        |        |      |        |      |
|------------------------|------|------|-----|---------|---------|---------|---------|---------|---------|--------|--------|--------|------|--------|------|
| BCD-6-17               | 190  | 1899 | 0.1 | 0.07680 | 0.00194 | 2.01473 | 0.09850 | 0.18896 | 0.00806 | 1116.7 | 50.5   | 1120.5 | 33.2 | 1115.7 | 43.7 |
| BCD-6-18               | 712  | 785  | 0.9 | 0.05782 | 0.00163 | 0.58158 | 0.01720 | 0.07268 | 0.00123 | 524.1  | 61.1   | 465.5  | 11.0 | 452.3  | 7.4  |
| BCD-6-19               | 230  | 545  | 0.4 | 0.05487 | 0.00193 | 0.55351 | 0.02290 | 0.07294 | 0.00189 | 405.6  | 77.8   | 447.3  | 15.0 | 453.8  | 11.4 |
| BCD-6-20               | 148  | 869  | 0.2 | 0.07196 | 0.00212 | 1.39205 | 0.13206 | 0.14298 | 0.01285 | 984.9  | 59.7   | 885.6  | 56.1 | 861.5  | 72.5 |
| <i>BCN-1 (Granite)</i> |      |      |     |         |         |         |         |         |         |        |        |        |      |        |      |
| BCN-1-02               | 548  | 1180 | 0.5 | 0.05003 | 0.00194 | 0.12686 | 0.00512 | 0.01889 | 0.00064 | 194.5  | 90.7   | 121.3  | 4.6  | 120.7  | 4.0  |
| BCN-1-03               | 625  | 1003 | 0.6 | 0.05010 | 0.00214 | 0.13248 | 0.00865 | 0.01889 | 0.00063 | 198.2  | 98.1   | 126.3  | 7.8  | 120.6  | 4.0  |
| BCN-1-05               | 1589 | 661  | 2.4 | 0.04696 | 0.00123 | 0.12276 | 0.00376 | 0.01887 | 0.00047 | 55.7   | 53.7   | 117.6  | 3.4  | 120.5  | 3.0  |
| BCN-1-06               | 599  | 1036 | 0.6 | 0.05055 | 0.00167 | 0.13042 | 0.00476 | 0.01894 | 0.00057 | 220.4  | 75.9   | 124.5  | 4.3  | 120.9  | 3.6  |
| BCN-1-07               | 377  | 797  | 0.5 | 0.04605 | 0.00150 | 0.11816 | 0.00469 | 0.01880 | 0.00062 | 400.1  | -324.0 | 113.4  | 4.3  | 120.1  | 3.9  |
| BCN-1-08               | 2314 | 771  | 3.0 | 0.05237 | 0.00152 | 0.13449 | 0.00414 | 0.01878 | 0.00046 | 301.9  | 64.8   | 128.1  | 3.7  | 120.0  | 2.9  |
| BCN-1-09               | 626  | 1186 | 0.5 | 0.05049 | 0.00154 | 0.12965 | 0.00392 | 0.01897 | 0.00051 | 216.7  | 70.4   | 123.8  | 3.5  | 121.1  | 3.2  |
| BCN-1-10               | 364  | 981  | 0.4 | 0.04757 | 0.00122 | 0.12406 | 0.00373 | 0.01892 | 0.00044 | 79.7   | 91.7   | 118.7  | 3.4  | 120.9  | 2.8  |
| BCN-1-11               | 448  | 999  | 0.4 | 0.05086 | 0.00260 | 0.13017 | 0.00506 | 0.01884 | 0.00047 | 235.3  | 113.9  | 124.2  | 4.5  | 120.3  | 3.0  |
| BCN-1-12               | 2535 | 877  | 2.9 | 0.04847 | 0.00129 | 0.12624 | 0.00407 | 0.01882 | 0.00045 | 124.2  | 63.0   | 120.7  | 3.7  | 120.2  | 2.8  |
| BCN-1-13               | 818  | 1305 | 0.6 | 0.04999 | 0.00144 | 0.12827 | 0.00447 | 0.01887 | 0.00059 | 194.5  | 66.7   | 122.5  | 4.0  | 120.5  | 3.7  |
| BCN-1-14               | 1719 | 920  | 1.9 | 0.04737 | 0.00129 | 0.12301 | 0.00402 | 0.01892 | 0.00049 | 77.9   | -134.2 | 117.8  | 3.6  | 120.8  | 3.1  |
| BCN-1-18               | 717  | 1440 | 0.5 | 0.04910 | 0.00190 | 0.12300 | 0.00482 | 0.01879 | 0.00063 | 153.8  | 90.7   | 117.8  | 4.4  | 120.0  | 4.0  |
| BCN-1-20               | 729  | 1408 | 0.5 | 0.05392 | 0.00162 | 0.13918 | 0.00465 | 0.01882 | 0.00048 | 368.6  | 68.5   | 132.3  | 4.1  | 120.2  | 3.1  |
| BCN-1-23               | 138  | 445  | 0.3 | 0.06445 | 0.00145 | 0.90459 | 0.02622 | 0.10221 | 0.00259 | 766.7  | 47.1   | 654.2  | 14.0 | 627.4  | 15.2 |
| BCN-1-25               | 694  | 1420 | 0.5 | 0.04896 | 0.00156 | 0.12493 | 0.00461 | 0.01892 | 0.00060 | 146.4  | 71.3   | 119.5  | 4.2  | 120.8  | 3.8  |
| BCN-1-27               | 1613 | 2051 | 0.8 | 0.04823 | 0.00141 | 0.12194 | 0.00435 | 0.01881 | 0.00062 | 109.4  | 68.5   | 116.8  | 3.9  | 120.1  | 3.9  |

Continued

|                        |      |      |     |         |         |         |         |         |         |       |       |       |      |       |     |
|------------------------|------|------|-----|---------|---------|---------|---------|---------|---------|-------|-------|-------|------|-------|-----|
| BCN-1-28               | 1541 | 1173 | 1.3 | 0.04961 | 0.00141 | 0.12720 | 0.00413 | 0.01880 | 0.00053 | 176.0 | 66.7  | 121.6 | 3.7  | 120.1 | 3.4 |
| BCN-1-30               | 765  | 1415 | 0.5 | 0.05048 | 0.00145 | 0.12976 | 0.00430 | 0.01893 | 0.00055 | 216.7 | 66.7  | 123.9 | 3.9  | 120.9 | 3.5 |
| <i>BCN-2 (Granite)</i> |      |      |     |         |         |         |         |         |         |       |       |       |      |       |     |
| BCN-2-02               | 174  | 459  | 0.4 | 0.04941 | 0.00323 | 0.12228 | 0.00861 | 0.01763 | 0.00038 | 168.6 | 158.3 | 117.1 | 7.8  | 112.6 | 2.4 |
| BCN-2-03               | 959  | 548  | 1.7 | 0.05264 | 0.00302 | 0.13205 | 0.00771 | 0.01805 | 0.00034 | 322.3 | 131.5 | 125.9 | 6.9  | 115.3 | 2.1 |
| BCN-2-04               | 711  | 1078 | 0.7 | 0.05259 | 0.00247 | 0.12929 | 0.00588 | 0.01790 | 0.00030 | 309.3 | 100.9 | 123.5 | 5.3  | 114.4 | 1.9 |
| BCN-2-05               | 1144 | 452  | 2.5 | 0.05212 | 0.00381 | 0.14596 | 0.01060 | 0.02007 | 0.00037 | 300.1 | 163.9 | 138.3 | 9.4  | 128.1 | 2.3 |
| BCN-2-07               | 186  | 1007 | 0.2 | 0.05558 | 0.00171 | 0.36301 | 0.01485 | 0.04691 | 0.00134 | 435.2 | 68.5  | 314.5 | 11.1 | 295.5 | 8.2 |
| BCN-2-08               | 881  | 524  | 1.7 | 0.04771 | 0.00343 | 0.11817 | 0.00866 | 0.01786 | 0.00030 | 83.4  | 172.2 | 113.4 | 7.9  | 114.1 | 1.9 |
| BCN-2-09               | 1088 | 991  | 1.1 | 0.04934 | 0.00216 | 0.12194 | 0.00539 | 0.01782 | 0.00025 | 164.9 | 103.7 | 116.8 | 4.9  | 113.9 | 1.6 |
| BCN-2-10               | 2778 | 1100 | 2.5 | 0.05278 | 0.00278 | 0.13099 | 0.00754 | 0.01789 | 0.00040 | 320.4 | 120.4 | 125.0 | 6.8  | 114.3 | 2.6 |
| BCN-2-11               | 1906 | 600  | 3.2 | 0.04919 | 0.00285 | 0.11770 | 0.00631 | 0.01768 | 0.00028 | 166.8 | 135.2 | 113.0 | 5.7  | 113.0 | 1.8 |
| BCN-2-12               | 2637 | 718  | 3.7 | 0.04720 | 0.00247 | 0.11234 | 0.00561 | 0.01753 | 0.00029 | 57.5  | 131.5 | 108.1 | 5.1  | 112.0 | 1.8 |
| BCN-2-13               | 671  | 1072 | 0.6 | 0.04788 | 0.00206 | 0.11731 | 0.00523 | 0.01768 | 0.00022 | 100.1 | 90.7  | 112.6 | 4.8  | 113.0 | 1.4 |
| BCN-2-16               | 949  | 845  | 1.1 | 0.04821 | 0.00225 | 0.11854 | 0.00562 | 0.01787 | 0.00032 | 109.4 | 107.4 | 113.7 | 5.1  | 114.2 | 2.0 |
| BCN-2-17               | 861  | 1277 | 0.7 | 0.05011 | 0.00307 | 0.12050 | 0.00642 | 0.01758 | 0.00023 | 198.2 | 147.2 | 115.5 | 5.8  | 112.3 | 1.5 |
| BCN-2-18               | 2254 | 1154 | 2.0 | 0.04762 | 0.00219 | 0.11612 | 0.00534 | 0.01763 | 0.00028 | 79.7  | 107.4 | 111.5 | 4.9  | 112.6 | 1.8 |
| BCN-2-19               | 1701 | 646  | 2.6 | 0.05450 | 0.00486 | 0.13080 | 0.01151 | 0.01772 | 0.00033 | 390.8 | 206.5 | 124.8 | 10.3 | 113.2 | 2.1 |
| BCN-2-20               | 513  | 836  | 0.6 | 0.05162 | 0.00221 | 0.12471 | 0.00509 | 0.01760 | 0.00027 | 333.4 | 98.1  | 119.3 | 4.6  | 112.5 | 1.7 |
| BCN-2-22               | 1931 | 592  | 3.3 | 0.05261 | 0.00478 | 0.14727 | 0.01494 | 0.02014 | 0.00034 | 322.3 | 202.8 | 139.5 | 13.2 | 128.5 | 2.1 |
| BCN-2-23               | 487  | 925  | 0.5 | 0.04856 | 0.00243 | 0.11807 | 0.00598 | 0.01758 | 0.00026 | 127.9 | -80.5 | 113.3 | 5.4  | 112.3 | 1.7 |

Continued

|                       |      |      |     |         |         |         |         |         |         |        |       |        |      |        |      |
|-----------------------|------|------|-----|---------|---------|---------|---------|---------|---------|--------|-------|--------|------|--------|------|
| BCN-2-24              | 706  | 1124 | 0.6 | 0.04887 | 0.00208 | 0.11933 | 0.00510 | 0.01772 | 0.00033 | 142.7  | 100.0 | 114.5  | 4.6  | 113.2  | 2.1  |
| BCN-2-26              | 496  | 916  | 0.5 | 0.05195 | 0.00528 | 0.12313 | 0.01307 | 0.01782 | 0.00075 | 283.4  | 235.2 | 117.9  | 11.8 | 113.8  | 4.7  |
| <i>TL-3 (Granite)</i> |      |      |     |         |         |         |         |         |         |        |       |        |      |        |      |
| TL-3-01               | 4051 | 1389 | 2.9 | 0.04641 | 0.00279 | 0.11228 | 0.00700 | 0.01739 | 0.00028 | 20.5   | 146.3 | 108.0  | 6.4  | 111.1  | 1.8  |
| TL-3-02               | 543  | 1040 | 0.5 | 0.04871 | 0.00246 | 0.11551 | 0.00549 | 0.01725 | 0.00030 | 200.1  | 123.1 | 111.0  | 5.0  | 110.3  | 1.9  |
| TL-3-03               | 630  | 1131 | 0.6 | 0.04720 | 0.00227 | 0.11210 | 0.00511 | 0.01728 | 0.00029 | 61.2   | 107.4 | 107.9  | 4.7  | 110.5  | 1.8  |
| TL-3-04               | 285  | 616  | 0.5 | 0.05020 | 0.00318 | 0.11751 | 0.00696 | 0.01698 | 0.00029 | 211.2  | 148.1 | 112.8  | 6.3  | 108.5  | 1.9  |
| TL-3-05               | 419  | 955  | 0.4 | 0.05230 | 0.00254 | 0.12291 | 0.00595 | 0.01690 | 0.00029 | 298.2  | 111.1 | 117.7  | 5.4  | 108.1  | 1.8  |
| TL-3-06               | 328  | 1646 | 0.2 | 0.04826 | 0.00185 | 0.16919 | 0.00668 | 0.02518 | 0.00039 | 122.3  | 95.4  | 158.7  | 5.8  | 160.3  | 2.4  |
| TL-3-08               | 660  | 1157 | 0.6 | 0.04721 | 0.00205 | 0.11264 | 0.00519 | 0.01705 | 0.00032 | 61.2   | 105.5 | 108.4  | 4.7  | 109.0  | 2.0  |
| TL-3-09               | 524  | 1108 | 0.5 | 0.04707 | 0.00196 | 0.11449 | 0.00487 | 0.01748 | 0.00027 | 53.8   | 96.3  | 110.1  | 4.4  | 111.7  | 1.7  |
| TL-3-11               | 589  | 998  | 0.6 | 0.05202 | 0.00227 | 0.12512 | 0.00549 | 0.01735 | 0.00033 | 287.1  | 100.0 | 119.7  | 5.0  | 110.9  | 2.1  |
| TL-3-12               | 590  | 971  | 0.6 | 0.04665 | 0.00211 | 0.11074 | 0.00503 | 0.01717 | 0.00032 | 31.6   | 168.5 | 106.6  | 4.6  | 109.7  | 2.1  |
| TL-3-14               | 487  | 1201 | 0.4 | 0.05081 | 0.00243 | 0.12290 | 0.00677 | 0.01736 | 0.00051 | 231.6  | 111.1 | 117.7  | 6.1  | 110.9  | 3.2  |
| TL-3-15               | 348  | 467  | 0.7 | 0.08662 | 0.00232 | 2.64691 | 0.07573 | 0.22068 | 0.00316 | 1353.7 | 51.9  | 1313.8 | 21.1 | 1285.5 | 16.7 |
| TL-3-17               | 686  | 1102 | 0.6 | 0.04697 | 0.00226 | 0.11132 | 0.00534 | 0.01716 | 0.00028 | 55.7   | 111.1 | 107.2  | 4.9  | 109.7  | 1.8  |
| TL-3-18               | 431  | 882  | 0.5 | 0.05145 | 0.00239 | 0.12375 | 0.00613 | 0.01734 | 0.00034 | 261.2  | 107.4 | 118.5  | 5.5  | 110.8  | 2.1  |
| TL-3-20               | 564  | 1112 | 0.5 | 0.04882 | 0.00231 | 0.11649 | 0.00602 | 0.01701 | 0.00033 | 139.0  | 111.1 | 111.9  | 5.5  | 108.7  | 2.1  |
| TL-3-21               | 1115 | 971  | 1.1 | 0.04878 | 0.00255 | 0.11704 | 0.00614 | 0.01717 | 0.00030 | 200.1  | 124.1 | 112.4  | 5.6  | 109.7  | 1.9  |
| TL-3-22               | 1042 | 1294 | 0.8 | 0.04642 | 0.00206 | 0.11123 | 0.00523 | 0.01723 | 0.00030 | 20.5   | 103.7 | 107.1  | 4.8  | 110.1  | 1.9  |
| TL-3-23               | 509  | 937  | 0.5 | 0.05271 | 0.00221 | 0.12648 | 0.00511 | 0.01740 | 0.00031 | 316.7  | 96.3  | 120.9  | 4.6  | 111.2  | 2.0  |
| TL-3-24               | 515  | 1171 | 0.4 | 0.04874 | 0.00228 | 0.11866 | 0.00606 | 0.01742 | 0.00038 | 200.1  | 111.1 | 113.9  | 5.5  | 111.3  | 2.4  |
| TL-3-25               | 996  | 420  | 2.4 | 0.04940 | 0.00359 | 0.11871 | 0.00819 | 0.01738 | 0.00037 | 168.6  | 159.2 | 113.9  | 7.4  | 111.1  | 2.3  |
